# Supplementary material for: Engineering Yarrowia lipolytica for sustainable production of the chamomile sesquiterpene (−)-α-bisabolol
Source: Royal Society of Chemistry journal article supplement (doi:10.1039/d0gc03180a), 2020-11-18

## Electronic Supplementary Material (ESI)

### Engineering *Yarrowia lipolytica* for sustainable production of the chamomile sesquiterpene (-)- $\alpha$ -bisabolol

Yirong Ma<sup>a</sup>, Wenjuan Li<sup>a</sup>, Jie Mai<sup>a</sup>, Jinpeng Wang<sup>a</sup>, Yongjun Wei<sup>c</sup>, Rodrigo Ledesma-Amaro<sup>b</sup>, Xiao-Jun Ji<sup>a, c\*</sup>

<sup>a</sup> College of Biotechnology and Pharmaceutical Engineering, Nanjing Tech University, No. 30 South Puzhu Road, Nanjing 211816, People's Republic of China

<sup>b</sup> Department of Bioengineering and Imperial College Centre for Synthetic Biology, Imperial College London, London SW7 2AZ, UK

<sup>c</sup> Key Laboratory of Advanced Drug Preparation Technologies, Ministry of Education, Zhengzhou University, No. 100 Kexue Avenue, Zhengzhou 450001, People's Republic of China

Correspondence: [xiaojunji@njtech.edu.cn](mailto:xiaojunji@njtech.edu.cn) (X.-J. Ji)

**Supplementary Table 1.** List of primers used in this study.

| <b>Names</b>           | <b>Sequences (5' &gt; 3')</b>                              |
|------------------------|------------------------------------------------------------|
| A08-MrBBS-F            | tactaacgcagTCTACCCTCTCCGTGTCCACTC                          |
| A08-MrBBS-R            | ccgtagttggatcTTACACAATCATAGGGTGGACGAA                      |
| tHMG-F                 | ctaaccgcagACCCAGTCTGTGAAGGT                                |
| tHMG-R                 | tagttggatcCTATGACCGTATGCAAATATTC                           |
| ERG20-F                | tttgagctacTAACCGCAGTCCAAGGCG                               |
| ERG20-R                | tagttggatcCTACTTCTGTGCGTTGTAAATCTTGG                       |
| SQS1-up-F              | aaaacgacggccagtggaattcAGCAGATGCGTGAGAGATTACCA              |
| SQS1-up-R              | cactggaagatccgggaattcATTAGCAACACGATCTACCCGAG               |
| SQS1-dm-F              | attgactggaacagcttaattaaGGACACAAACTCGCTTGTTCCACC            |
| SQS1-dm-R              | gccaaagcttggtaccttaattaaCTAATCTCTCAGAGGAAACATCTTAGA<br>GTC |
| A08-2MrBBS-Cassette-F  | ctgggtacgttcgatagcgctAGAGACCGGGTTGGCGGC                    |
| A08-2MrBBS-Cassette-R  | ctgtcgatgccgatagcgctGACACGGGCATCTCACTTGC                   |
| IntE-MrBBS- Cassette-F | attgactggaacagcttaattaaAGAGACCGGGTTGGCGGC                  |
| IntE-MrBBS- Cassette-R | cacaagcttggtaccttaattaaGACACGGGCATCTCACTTGC                |
| IntF-POX1-F            | taagaatcattcaaggatccATGGCCAAGGAGCGAGGT                     |
| IntF-POX1-R            | taactaattacatgaggatccTCACTCATCGAGATCGCAAATTT               |
| IntF-POX2-F            | taagaatcattcaaggatccATGAACCCCAACAACACTGGC                  |
| IntF-POX2-R            | taactaattacatgaggatccCTATTCCTCATCAAGCTCGCAA                |

|             |                                                 |
|-------------|-------------------------------------------------|
| IntF-POX3-F | taagaatcattcaaggatccATGATCTCCCCAACCTCACA        |
| IntF-POX3-R | taactaattacatgaggatccCTATTCTCGTCCAGCTCGCA       |
| IntF-POX4-F | taagaatcattcaaggatccATGATCACCCCAAACCCCG         |
| IntF-POX4-R | taactaattacatgaggatccTACTGAATATCCTCGGGCTCC      |
| IntF-POX5-F | taagaatcattcaaggatccATGAACAACAACCCCAACCAACG     |
| IntF-POX5-R | taactaattacatgaggatccCTACTCGTCCAGGTCGCAAATC     |
| IntF-POX6-F | taagaatcattcaaggatccATGCTCTCTCAACAGTCCCTCAA     |
| IntF-POX6-R | taactaattacatgaggatccCTACTCATCCTCAAGAGAGCAAATTT |
| IntF-MFE1-F | taagaatcattcaaggatccATGTCTGGAGAACTAAGATACGACGG  |
| IntF-MFE1-R | taactaattacatgaggatccTTAGAGCTTAGCATCCTTGGGG     |
| IntF-POT1-F | taagaatcattcaaggatccATGGACCGACTTAACAACCTCG      |
| IntF-POT1-R | taactaattacatgaggatccTACTCGGCAACAACCAGAGAA      |

---

In the nucleotide sequences, the lower case bases represent the homologous parts on adjacent fragments during one-step cloning, while the upper case bases represent the gene fragment parts.

**Supplementary Table 2. Synthetic gene fragment and gene sequences used in this study.**

| Names                                                                                                                                                                                                                                         | Sequences (5' > 3')                                                                                                                                                                                                                                                                                                                                                                                                                                                                                                                                                                                                                                                                                                                                                                                                                                                                                                                                                                                                                                                                                                                                                                                                                                                                                                                                                                                                                                                                                                                                                                                                                                                                                                                                                                                                                                                                                                                                                                                                                                                                                                    |
|-----------------------------------------------------------------------------------------------------------------------------------------------------------------------------------------------------------------------------------------------|------------------------------------------------------------------------------------------------------------------------------------------------------------------------------------------------------------------------------------------------------------------------------------------------------------------------------------------------------------------------------------------------------------------------------------------------------------------------------------------------------------------------------------------------------------------------------------------------------------------------------------------------------------------------------------------------------------------------------------------------------------------------------------------------------------------------------------------------------------------------------------------------------------------------------------------------------------------------------------------------------------------------------------------------------------------------------------------------------------------------------------------------------------------------------------------------------------------------------------------------------------------------------------------------------------------------------------------------------------------------------------------------------------------------------------------------------------------------------------------------------------------------------------------------------------------------------------------------------------------------------------------------------------------------------------------------------------------------------------------------------------------------------------------------------------------------------------------------------------------------------------------------------------------------------------------------------------------------------------------------------------------------------------------------------------------------------------------------------------------------|
| <p>Codon optimized (-)-<math>\alpha</math>-bisabolol synthase coding DNA (MrBBS) for <i>Yarrowia lipolytica</i> based on the sequence of (-)-<math>\alpha</math>-bisabolol synthase (GenBank: KJ020282.1) from <i>Matricaria recutita</i></p> | <p>ATGTCTACCCTCTCCGTGTCCACTCCTTCTCCTCCTCCCCCTCTTCCGTGAACAAAACTCCA<br/>         CCAAGCAGCACGTCACCCGAAACTCCGTGATCTTCCATGACTCTATCTGGGGCGACCAGTTCCCTCGAATA<br/>         TAAAGAGAAGTTTAATGTCGCTACTGAAAAGCAGCTGATCGAGGAACTCAAGGAGGAGGTCCGAAACGAA<br/>         CTCATGATCCGAGCTTGCAACGAGGCCTCCCGATACATTAAGTCACTCCAGCTGATCGACGTCGTGGAAC<br/>         GACTGGGCCTCGCTTATCACTTCGAGAAGGAGATCGAAGAGTCCCTCCAACACATCTACGTCACCTACGG<br/>         CCACAAGTGGACCAACTACAACAACATCGAGTCTCTCTCTCTCTGGTTTCGACTCCTCCGACAGAACGGT<br/>         TTCAACGTGTCTTCCGATATCTTTGAAAACCATATCGACGAAAAGGGCAACTTTCAAGAATCTTTATGCA<br/>         ACGACCCCAAGGTATGCTGGCTTTATACGAGGCCGCTACATGAGAGTCGAGGGTGGATCATTTTAGA<br/>         TAAGGCCCTCGAGTTTACCAAGCTGCACCTCGGCATCATTTCTAACGACCCCTCTTGCATTCTCTCTG<br/>         CGAACTGAGATCAAGCAAGCTTTAAAACAGCCTCTCCGACGAAGACTGCCTCGACTGGAGGCCGTCGGAT<br/>         ATATCGCTATTTACCAGCAGAAGGCTCCCACTCTGAGGTTTTACTCAAGCTCGCTAACTGGACTTTAA<br/>         CGTGCTCCAAGAAATGCACAAGGATGAGCTGTCCAGATCTGCAAATGGTGGAAAGACCTCGACATCCGA<br/>         AACAAAGCTCCCTACGTCAGAGACCGACTGATTGAGGGCTACTTCTGGATTTTAGGCATCTACTTTGAGC<br/>         CCCAGCACTCCCGAACCCGAATGTTTTTAATGAAGACTTGTATGTGGCTCATGTTTTAGACGACACCTT<br/>         TGACAACCTACGGCACTTACGAGGAGCTGGAGATCTTACCCAAGCTGTCGAGCGATGGTCCATCACTTGT<br/>         CTGGACGAGCTGCCCGAGTACATGAAGCTCATCTACCATGAGCAGTTCGAGTCCATCAAGAGATGGAGG<br/>         AGTCCCTCGAAGAAAGAGGGCAAGGCCTACCAGATCCATTACATCAAAGAGATGGCCAAGGAGGGCACTCG<br/>         ATCCTTATTACTGGAGGCCAAGTGGCTGAAGGAGGTTATATGCCACCCTCGACGAGTACCTCTCCAAC<br/>         TCTTTAGTCACTTGTGGCTACGCTCTCATGACTGCCAGATCTTACGTCTGTCGAGACGATGGTATCGTGA<br/>         CCGAGGACGCTTTCAAATGGGTGCTACTCACCCCTATCGTGAAGGCCGCTTGTAAAGATTCTCCGACT<br/>         CATGGACGACATCGCCACCATAAGGAGGAGCAAGAACGAGGCCACATCGCCTCTTCTATCGAGTGTCTAC<br/>         AGAAAGGAGACCGGCGCTCTGAGGAGGAGGCTTGCATGGACTTTCTCAAGCAAGTTGAAGATGGCTGGA<br/>         AGGTCATTAACCAAGAATCTCTCATGCCTACCGACGTGCCCTTCCCCTTATTAATCCCGCTATCAACCT<br/>         CGCCCAGTGTCCGACACTTTATATAAAGACAACGACGGCTACAATCACGCCGATAAGGAGGTGATCGGC<br/>         TACATCAAGTCCCTCTTCGTCCACCTATGATTGTGTAA</p> |

|                                                                                                                             |                                                                                                                                                                                                                                                                                                                                                                                                                                                                                                                                                                                                                                                                                                                                                                                                                                                                                                                                                                                                                                                                                                                                                                                                                                                                                                                                                                                                                                                                                                                                                                                                                                                                                               |
|-----------------------------------------------------------------------------------------------------------------------------|-----------------------------------------------------------------------------------------------------------------------------------------------------------------------------------------------------------------------------------------------------------------------------------------------------------------------------------------------------------------------------------------------------------------------------------------------------------------------------------------------------------------------------------------------------------------------------------------------------------------------------------------------------------------------------------------------------------------------------------------------------------------------------------------------------------------------------------------------------------------------------------------------------------------------------------------------------------------------------------------------------------------------------------------------------------------------------------------------------------------------------------------------------------------------------------------------------------------------------------------------------------------------------------------------------------------------------------------------------------------------------------------------------------------------------------------------------------------------------------------------------------------------------------------------------------------------------------------------------------------------------------------------------------------------------------------------|
| <p style="text-align: center;">Hydroxy-3-<br/>methylglutaryl-CoA<br/>reductase (HMG1)<br/>coding DNA<br/>(YALI0E04807g)</p> | <p>ATGACCCAGTCTGTGAAGGTGGTTGAGAAGCACGTTCTATCGTCATTGAGAAGCCCA<br/>GCGAGAAGGAGGAGGACACCTCTTCTGAAGACTCCATTGAGCTGACTGTCCGAAAGCA<br/>GCCCCAAGCCCGTGACCGAGACCCGTTCTCTGGACGACCTAGAGGCTATCATGAAGGCA<br/>GGTAAGACCAAGCTTCTGGAGGACCACGAGGTTGTCAAGCTCTCTCTCGAGGGCAAGC<br/>TTCCTTTGTATGCTCTTGAGAAGCAGCTTGGTGACAACACCCGAGCTGTTGGCATCCG<br/>ACGATCTATCATCTCCCAGCAGTCTAATACCAAGACTTTAGAGACCTCAAAGCTTCCT<br/>TACCTGCACACTACGACTACGACCGTGTTTTTGGAGCCTGTTGCCGAGAACGTTATTTGGTT<br/>ACATGCCTCTCCCCGTTGGTGTGCTGGCCCCATGAACATTGATGGCAAGAATAACCA<br/>CATTCTATGGCCACCCTGAGGGTGTCTTGTGCTCAACCATGCGAGGTTGCAAG<br/>GCCATCAACGCCGGTGGCGGTGTTACCCTGTGCTTACTCAGGACGGTATGACACGAG<br/>GTCCTTGTGTTTCCCTTCCCCTCTCTCAAGCGGGCTGGAGCCGCTAAGATCTGGCTTGA<br/>TTCCGAGGAGGGTCTCAAGTCCATGCGAAAGGCCTTCAACTCCACCTCTCGATTTGCT<br/>CGTCTCCAGTCTCTTCACTCTACCCTTGTGTAACCTGCTGTTTATTCGATTCCGAA<br/>CCACCCTGGTGTATGCCATGGGCATGAACATGATCTCCAAGGGCGTGAACACTCTCT<br/>GGCCGTCATGGTCAAGGAGTACGGCTTCCCCTGATATGGACATTGTGTCTGTCTCGGGT<br/>AACTACTGCACTGACAAGAAGCCCGCAGCGATCAACTGGATCGAAGGCCGAGGCAAGA<br/>GTGTTGTTGCCGAAGCCACCATCCCTGCTCACATTGTCAAGTCTGTTCTCAAAAGTGA<br/>GGTTGACGCTCTTGTGAGCTCAACATCAGCAAGAATCTGATCGGTAGTGCCATGGCT<br/>GGCTCTGTGGGAGGTTTCAATGCACACGCCGCAAACCTGGTGACCGCCATCTACCTTG<br/>CCACTGGCCAGGATCCTGCTCAGAATGTCGAGTCTTCCAACATGCATCACGCTGATGAG<br/>CAACGTCGACGGTAACCTGCTCATCTCCGTTTCCATGCCTTCTATCGAGGTGGTACC<br/>ATTGGTGGAGGTACTATTTTGGAGCCCCAGGGGGCTATGCTGGAGATGCTTGGCGTGC<br/>GAGGTCTCACATCGAGACCCCGGTGCCAACGCCAACAGCTTGTCTGCATCATTGC<br/>TTCTGGAGTTCTTGCAGCGGAGCTTTCGCTGTGTTCTGCTCTTGTGCTGCCGGCCATCTT<br/>GTGCAAAGTCATATGACCCACAACCGGTCCCAGGCTCCTACTCCGGCCAAGCAGTCTC<br/>AGGCCGATCTGCAGCGTCTACAAAACGGTTCGAATATTTGCATACGGTCATAG</p> |
|-----------------------------------------------------------------------------------------------------------------------------|-----------------------------------------------------------------------------------------------------------------------------------------------------------------------------------------------------------------------------------------------------------------------------------------------------------------------------------------------------------------------------------------------------------------------------------------------------------------------------------------------------------------------------------------------------------------------------------------------------------------------------------------------------------------------------------------------------------------------------------------------------------------------------------------------------------------------------------------------------------------------------------------------------------------------------------------------------------------------------------------------------------------------------------------------------------------------------------------------------------------------------------------------------------------------------------------------------------------------------------------------------------------------------------------------------------------------------------------------------------------------------------------------------------------------------------------------------------------------------------------------------------------------------------------------------------------------------------------------------------------------------------------------------------------------------------------------|

|                                                                                                    |                                                                                                                                                                                                                                                                                                                                                                                                                                                                                                                                                                                                                                                                                                                                                                                                                                                                                                                                                                                                                                                                                                                                                                                                                                                                                                                                                                                                                                                                                                                                                                                                                                                                                     |
|----------------------------------------------------------------------------------------------------|-------------------------------------------------------------------------------------------------------------------------------------------------------------------------------------------------------------------------------------------------------------------------------------------------------------------------------------------------------------------------------------------------------------------------------------------------------------------------------------------------------------------------------------------------------------------------------------------------------------------------------------------------------------------------------------------------------------------------------------------------------------------------------------------------------------------------------------------------------------------------------------------------------------------------------------------------------------------------------------------------------------------------------------------------------------------------------------------------------------------------------------------------------------------------------------------------------------------------------------------------------------------------------------------------------------------------------------------------------------------------------------------------------------------------------------------------------------------------------------------------------------------------------------------------------------------------------------------------------------------------------------------------------------------------------------|
| <p>HMG1 truncated by deleting the N-terminal 500 amino acids to generate the tHMG1, coding DNA</p> | <p>ACCAGTCTGTGAAGTGGTTGAGAAGCACGTTCCATCGTCATTGAGAAGCCAGCGAGA<br/> AGGAGGAGGACACCTCTTCTGAAGACTCCATTGAGCTGACTGTCGAAAGCAGCCCAAGCC<br/> CGTGACCGAGACCCGTTCTCTGGACGACCTAGAGGCTATCATGAAGGCAGTAAGACCAAG<br/> CTTCTGGAGGACCACGAGGTTGTCAAGCTCTCTCTCGAGGGCAAGCTTCCTTTGTATGCTCTT<br/> GAGAAGCAGCTTGGTGACAACACCCGAGCTGTTGGCATCCGACGATCTATCATCTCCCAGC<br/> AGTCTAATACCAAGACTTTAGAGACCTCAAAGCTTCCTTACCTGCACTACGACTACGACCGT<br/> GTTTTTGGAGCCTGTTGCGAGAACGTTATTGGTTACATGCCTCTCCCCGTTGGTGTGCTGGC<br/> CCCATGAACATTGATGGCAAGAACTACCACATTCCATGGCCACCACTGAGGGTTGCTTGT<br/> TGCCTCAACCATGCGAGGTTGCAAGGCCATCAACGCCGGTGGCGGTGTTACCACTGTGCTTA<br/> CTCAGGACGGTATGACACGAGGTCTTGTGTTTCCCTCTCTCAAGCGGGCTGGAGCC<br/> GCTAAGATCTGGCTTGATTCCGAGGAGGTCTCAAGTCCATGCGAAAGGCCCTCAACTCCAC<br/> CTCTCGATTTGCTCGTCTCCAGTCTTCACTCTACCCTTGTGGTAACTGTGTTTATTTCGA<br/> TTCCGAACCACCACTGGTGATGCCATGGGCATGAACATGATCTCCAAGGGCGTCAACACT<br/> CTCTGGCCGTCATGGTCAAGGAGTACGGCTTCCCTGATATGGACATTGTGTCTGTCTCGGGT<br/> AACTACTGCACTGACAAGAAGCCCGCAGCGATCAACTGGATCGAAGGCCGAGGCAAGAGT<br/> GTTGTTGCCGAAGCCACCATCCCTGCTCACATTGTCAAGTCTGTTCTCAAAAGTGAGGTTGA<br/> CGCTCTGTTGAGCTCAACATCAGCAAGAATCTGATCGGTAGTGCCATGGCTGGCTCTGTGG<br/> GAGGTTTCAATGCACACGCCGCAAACCTGGTGACCGCATCTACCTTGCCACTGGCCAGGAT<br/> CCTGCTCAGAATGTCGAGTCTTCCAACCTGCATCACGCTGATGAGCAACGTCGACGGTAACT<br/> GCTCATCTCCGTTTCCATGCCTTCTATCGAGGTCGGTACCATTGGTGGAGGTAATTTTGA<br/> GCCCCAGGGGGCTATGCTGGAGATGCTTGGCGTGCAGGTCCTCACATCGAGACCCCCGGT<br/> GCCAACGCCAACAGCTTGTCTGCATCATGCTTCTGGAGTCTTGCAGCGGAGCTTTCGCT<br/> GTGTTCTGCTCTTGTGCGGCCATCTTGTGCAAAGTCATATGACCCACAACCGGTCCCAGG<br/> CTCCTACTCCGGCCAAGCAGTCTCAGGCCGATCTGCAGCGTCTACAAAACGGTTCGAATATT<br/> TGCATACGGTCATAG</p> |
| <p>FPP synthase (ERG20) coding DNA (YALI0E05753g)</p>                                              | <p>ATGTCCAAGGCGAAATTCGAAAGCGTGTTCCCCGAATCTCCGAGGAGCTGGTGCAGC<br/> TGCTGCGAGACGAGGGTCTGCCCCAGGATGCCGTGCAGTGGTTTTCCGACTCACTTCA<br/> GTACAACCTGTGTGGGTGGAAAGCTCAACCGAGGCCTGTCTGTGGTGCACACCTACCAG<br/> CTACTGACCGGCAAGAAGGAGCTCGATGACGAGGAGTACTACCGACTCGCGCTGCTCG<br/> GCTGGCTGATTGAGCTGCTGCAGGCGTTTTTCTCGTGTCCGACGACATTATGGATGA<br/> GTCCAAGACCCGACGAGGCCAGCCCTGCTGGTACCTCAAGCCCAAGGTCGGCATGATT<br/> GCCATCAACGATGCTTTTCATGCTAGAGAGTGGCATCTACATTCTGCTTAAGAAGCATT<br/> TCCGACAGGAGAAGTACTACATTGACCTTGTGCGAGCTGTTCCACGACATTTTCGTTCAA<br/> GACCGAGCTGGGCCAGCTGGTGGATCTTCTGACTGCCCCGAGGATGAGGTTGATCTC<br/> AACCGGTTCTCTCTGGACAAGCACTCCTTTATGTGCGATACAAGACTGCTTACTACT<br/> CCTTCTACCTGCCCCGTTGTTCTAGCCATGTACGTGGCCGGCATTACCAACCCCAAGGA<br/> CCTGACGAGGCCATGGATGTGCTGATCCCTCTCGGAGAGTACTTCCAGGTCCAGGAC<br/> GACTACCTTGACAACCTTGGAGACCCCGAGTTCATTGGTAAGATCGGCACCGACATCC<br/> AGGACAACAAGTGCTCCTGGCTCGTTAACAAAGCCCTTCAGAAGGCCACCCCGAGCA<br/> GCGACAGATCCTCGAGGACAACCTACGGCGTCAAGGACAAGTCCAAGGAGCTCGTCATC<br/> AAGAACTGTATGATGACATGAAGATTGAGCAGGACTACCTTACTACGAGGAGGAGG<br/> TTGTTGGCGACATCAAGAAGAAGATCGAGCAGGTTGACGAGAGCCGAGGCTTCAAGAA</p>                                                                                                                                                                                                                                                                                                                                                                                                                                                                                                                                                     |

|                                                              |                                                                                                                                                                                                                                                                                                                                                                                                                                                                                                                                                                                                                                                                                                                                                                                                                                                                                                                                                                                                                                                                                                                                                                                                                                                                                                                                                                                                                                                                                                                                                                                                                                                                                                                                                                                                                                                                                                                                                                                                                                                                                                                                                                                                                                                                                                                          |
|--------------------------------------------------------------|--------------------------------------------------------------------------------------------------------------------------------------------------------------------------------------------------------------------------------------------------------------------------------------------------------------------------------------------------------------------------------------------------------------------------------------------------------------------------------------------------------------------------------------------------------------------------------------------------------------------------------------------------------------------------------------------------------------------------------------------------------------------------------------------------------------------------------------------------------------------------------------------------------------------------------------------------------------------------------------------------------------------------------------------------------------------------------------------------------------------------------------------------------------------------------------------------------------------------------------------------------------------------------------------------------------------------------------------------------------------------------------------------------------------------------------------------------------------------------------------------------------------------------------------------------------------------------------------------------------------------------------------------------------------------------------------------------------------------------------------------------------------------------------------------------------------------------------------------------------------------------------------------------------------------------------------------------------------------------------------------------------------------------------------------------------------------------------------------------------------------------------------------------------------------------------------------------------------------------------------------------------------------------------------------------------------------|
|                                                              | GGAGGTGCTCAACGCTTTTCCTCGCCAAGATTTACAAGCGACAGAAGTAG                                                                                                                                                                                                                                                                                                                                                                                                                                                                                                                                                                                                                                                                                                                                                                                                                                                                                                                                                                                                                                                                                                                                                                                                                                                                                                                                                                                                                                                                                                                                                                                                                                                                                                                                                                                                                                                                                                                                                                                                                                                                                                                                                                                                                                                                       |
| Acyl-CoA oxidase 1<br>(POX1) coding<br>DNA<br>(YALI0E32835g) | <p>ATGGCCAAGGAGCGAGGTAAGACTCAATTCCTGTCGAGATGTGACCAACTTCCTCA<br/> ATGGTGGAGAAGAAGAGACCCAGATTGTCGAGAAGATCATGAGCAGTATTGAACGTGA<br/> TCCAGTACTGTCTGTCACTGTGACTACGACTGCAACCTTCAGCAGGCCCGAAAACAG<br/> ACCATGGAGCGGGTGGCTGCTCTGTGCGCTTATCTGGTCACCGATACTGAGAAGCTAT<br/> CTCTGTGGCGTGCGCAACTGCATGGAATGGTTGATATGTCTACTCGTACGCGGTTGTC<br/> GATCCACAACAACCTGTTTTCATTGGTTCCATCAGGGGATCTGGTACTCCTGAACAGTTC<br/> AAGTACTGGGTCAAGAAGGGAGCGGTGGCTGTTAAGCAGTTCATGATGCTTTGCCA<br/> TGACAGAGTTGGGCCATGGAAGCAACCTCAAGGGACTAGAGACAACCGCCACTTATGA<br/> CCAGGACAGTGACCAGTTCATTATCAAACTCCTCATATTGGTGCTACCAAGTGGTGG<br/> ATTGGCGGTGCAGCCACACTTCCACCCATTGTGTTTTGTTTCGCGAAACTGATGTGTC<br/> ATGGCAAGGACTATGGTACTCGAAACTTTGTGGTACCTCTCCGAAATGTCCACGATCA<br/> CAGTCTCAAGGTCGGTGTTCATTGGAGACATTGGAAGAAGATGGGCAGAGATGGT<br/> GTTGACAATGGCTGGATCCAGTTCACCAATGTTGCAATCCCCAGACAGAACATGCTAA<br/> TGAGATATGCCAAGGTGTCTGATACTGGAGTGGTAACCAACCCGCTCTTGACCAACT<br/> CACTTATGGAGCCCTCATTCGAGGTGCGAGTGTCCATGATTGCCGACTCGTTCACGTC<br/> TCCAAACGATTCTCACAATTGCTCTTCGGTACGCTTGTGTCCGACGACAGTTTGAA<br/> CCTCTGGAGACACTAAGGAGACCAAGATCATCGACTACCCCTACCACCAGCGACGATT<br/> GCTGCCTCTTCTGGCCTACTGCTACGCTATGAAGATGGGTGCTGATGAGGCTCAGAAG<br/> ACTTGGATTGAGACCACCGATCGAATTCTGGCTCTCAATCCCAACGACCCCGCCAGA<br/> AGAACGATCTGGAGAAGGCCGTCACCGACACAAAGGAGCTGTTTGTGCGTCTGCAGG<br/> AATGAAGGCATTTACCACGTGGGGATGTGCCAAAATCATTGATGAGTGCCGACAGGCC<br/> TGTGGAGGTCATGGATACTCTGGATATAACGGATTTGGCCAGGGCTACGCTGACTGGG<br/> TTGTCCAGTGTACCTGGGAAGGAGACAACAACGTTCTGTGTCTGTCAATGGGCCGAGG<br/> GCTGGTTCAGTCAGCTCTACAGATTTTGGCTGGAAAGCACGTCGGTGCTTCTATTTCAG<br/> TACGTAGGAGACAAGTCTAAAATCTCCAGAACGGCCAGGGTACCCCGAGAGACAAC<br/> TTCTGTCCCCGAGTTTCTAGTAGAAGCTTTCAGAACGGCTTCTCGAAACAACATTCT<br/> CAGAACCACCGATAAATACCAAGAGCTTGTCAAACTCTCAATCCCGACCAGGCCTTT<br/> GAGGAGCTGTCTCAGCAGAGATTCCAGTGTGCTCGAATCCACACACGACAGCATCTTA<br/> TCTCTTCATTCTATGCCCCAATTGCCACTGCCAAAGACGATATCAAGCCCCATCTGCT<br/> GAAACTGGCCAATCTGTTTGCCTCTGGTCAATTGAGGAGGACTGGAATCTTCCTG<br/> CGGGAGAACATCCTCACCCCTGGAGACATTGACCTGATCAACAGTCTTGTGGACGAGC<br/> TCTGTGTTGCAGTTCGAGATCAGGTAATTGGACTCACTGATGCCTTTGGTCTCTCTGA<br/> CTTCTTCATTAAACGCTCCCATCGGCTCCTACGATGGTAATGTTTACGAAAAGTACTTT<br/> GCCAAGGTCAACCAGCAAACCCCGCTACTAACCCCTCGTCTCCCTACTACGAGTCGA<br/> CTCTCAAGCCCTTCTTGTTCGAGAAGAGGAGGACGATGAAATTTGCGATCTCGATGA<br/> GTGA</p> |

|                                                                        |                                                                                                                                                                                                                                                                                                                                                                                                                                                                                                                                                                                                                                                                                                                                                                                                                                                                                                                                                                                                                                                                                                                                                                                                                                                                                                                                                                                                                                                                                                                                                                                                                                                                                                                                                                                                                                                                                                                                                                                                                                                                                                                                                                                                                                                                                                                                                                                                           |
|------------------------------------------------------------------------|-----------------------------------------------------------------------------------------------------------------------------------------------------------------------------------------------------------------------------------------------------------------------------------------------------------------------------------------------------------------------------------------------------------------------------------------------------------------------------------------------------------------------------------------------------------------------------------------------------------------------------------------------------------------------------------------------------------------------------------------------------------------------------------------------------------------------------------------------------------------------------------------------------------------------------------------------------------------------------------------------------------------------------------------------------------------------------------------------------------------------------------------------------------------------------------------------------------------------------------------------------------------------------------------------------------------------------------------------------------------------------------------------------------------------------------------------------------------------------------------------------------------------------------------------------------------------------------------------------------------------------------------------------------------------------------------------------------------------------------------------------------------------------------------------------------------------------------------------------------------------------------------------------------------------------------------------------------------------------------------------------------------------------------------------------------------------------------------------------------------------------------------------------------------------------------------------------------------------------------------------------------------------------------------------------------------------------------------------------------------------------------------------------------|
| <p>Acyl-CoA oxidase 2<br/>(POX2) coding<br/>DNA<br/>(YALI0F10857g)</p> | <p>ATGAACCCCAACAACACTGGCACCATTGAAATCAACGGTAAGGAGTACAACACCTTCA<br/> CCGAGCCCCCGTGGCCATGGCTCAGGAGCGAGCCAAGACCTCCTTCCCCGTGCGAGA<br/> GATGACCTACTTCCTCGACGGTGGCGAGAAGAACACCCTCAAAAACGAGCAGATCATG<br/> GAGGAGATTGAGCGAGACCCTCTTTTCAACAACGACAACACTACTACGATCTCAACAAGG<br/> AGCAGATCCGAGAGCTCACCATGGAGCGAGTCGCCAAGCTGTCTCTGTTTGTGCGTGA<br/> TCAGCCCGAGGACGACATCAAGAAGCGATTTGCTCTCATTGGTATCGCCGATATGGGA<br/> ACCTACACCCGACTTGGTGTCCACTACGGCCTCTTCTTTGGCGCCGTCCGAGGTACCG<br/> GAACTGCCGAGCAGTTTGGCCACTGGATCTCCAAGGGAGCCGGAGACCTGCGAAAAGTT<br/> CTACGGATGTTTCTCCATGACCAGCTGGGCCATGGCTCCAACCTGGCTGGTCTCGAG<br/> ACCACCGCCATCTACGATGAGGAGACCGACGAGTTCATCATCAACACCCCTCACATTG<br/> CCGCCACCAAGTGGTGGATTGGAGGAGCCGCCACACCGCCACCCACACTGTCGTGTT<br/> CGCCCGACTCATTGTCAAGGGCAAGGACTACGGTGTCAAGACCTTTGTTGTCCAGCTG<br/> CGAAACATCAACGACCACAGCCTCAAGGTCGGTATCTCTATTGGTGATATCGGAAAGA<br/> AGATGGGCCGAGACGGTATCGATAACGGATGGATCCAGTTCACCAACGTGCGAATCCC<br/> CCGACAGAACCTGCTCATGAAGTACACAAAGGTCGACCGAGAGGGTAACGTGACCCAG<br/> CCTCCTCTGGCTCAGCTTACCTACGGTTCCTTATCACTGGTCGAGTCTCCATGGCCT<br/> CTGATTCTCACCAGGTCGGAAGCGATTTCATCACCATTGCTCTGCGATACGCCTGCAT<br/> TCGACGACAGTTCTCCACCACCCCGGCCAGCCGAGACCAAGATCATCGACTACCCC<br/> TACCATCAGCGACGACTTCTGCCTCTTCTGGCCTATGTCTATGCTCTTAAGATGACTG<br/> CCGATGAGGTTGGAGCTCTCTTCTCCGAACCATGCTTAAGATGGACGACCTCAAGCC<br/> CGACGACAAGGCCCGCCTCAATGAGGTTGTTTCCGACGTCAAGGAGCTCTTCTCCGTC<br/> TCCGCCGGTCTCAAGGCCTTCTCCACCTGGGCTTGTGCCGACGTCATTGACAAGACCC<br/> GACAGGCTTGGGTTGGCCACGGTTACTCTGGATACAACGGTTTCGGCCAGGCCTACGC<br/> CGACTGGGTTGTCCAGTGACCTGGGAGGGTGACAACAACATTCTCACCCTTTCTGCC<br/> GGCCGAGCTTTATCCAGTCTGCCGTTGCTCTGCGAAAGGGCGAGCCTGTTGGTAACG<br/> CCGTTTCTTACCTGAAGCGATAACAAGGATCTGGCCAACGCTAAGCTCAATGGCCGATC<br/> TCTCACCGACCCCAAGGTCCTCGTCGAGGCCTGGGAGGTTGCTGCCGGTAACATCATC<br/> AACCGAGCCACCGACCAGTACGAGAAGCTCATTTGGCGAGGGTCTTAACGCCGACCAGG<br/> CCTTTGAGGTTCTGTCTCAGCAGGATTCCAGGCCGCAAGGTCCACACACGACGACA<br/> CCTCATTGCCGCTTTCTTCTCCCGAATTGACACCGAGGCTGGCGAGGCCATCAAGCAG<br/> CCCCTGCTTAACCTGGCTCTGTGTTTGGCCTGTGGTCCATCGAAGAGGACTCTGGTC<br/> TGTTCTGCGAGAGGGCTTCTCGAGCCCAAGGATATCGACACCGTACCGAGCTCGT<br/> CAACAAGTACTGCACCACTGTGCGAGAGGAGGTCATTGGCTACACCGATGCCTTCAAC<br/> CTGTCCGACTACTTCATCAACGCTCCTATTGGATGCTACGATGGTGACGCTTACCGAC<br/> ACTACTTCCAGAAGGTCAACGAGCAGAACCCTGCCCGAGACCCCGACCTCCTTACTA<br/> CGCCTTACTCTCAAGCCCTCCTTTTCCGAGAGGAGGAGGATGATGACATTTGCGAG<br/> CTTGATGAGGAATAG</p> |
|------------------------------------------------------------------------|-----------------------------------------------------------------------------------------------------------------------------------------------------------------------------------------------------------------------------------------------------------------------------------------------------------------------------------------------------------------------------------------------------------------------------------------------------------------------------------------------------------------------------------------------------------------------------------------------------------------------------------------------------------------------------------------------------------------------------------------------------------------------------------------------------------------------------------------------------------------------------------------------------------------------------------------------------------------------------------------------------------------------------------------------------------------------------------------------------------------------------------------------------------------------------------------------------------------------------------------------------------------------------------------------------------------------------------------------------------------------------------------------------------------------------------------------------------------------------------------------------------------------------------------------------------------------------------------------------------------------------------------------------------------------------------------------------------------------------------------------------------------------------------------------------------------------------------------------------------------------------------------------------------------------------------------------------------------------------------------------------------------------------------------------------------------------------------------------------------------------------------------------------------------------------------------------------------------------------------------------------------------------------------------------------------------------------------------------------------------------------------------------------------|



|                                                                        |                                                                                                                                                                                                                                                                                                                                                                                                                                                                                                                                                                                                                                                                                                                                                                                                                                                                                                                                                                                                                                                                                                                                                                                                                                                                                                                                                                                                                                                                                                                                                                                                                                                                                                                                                                                                                                                                                                                                                                                                                                                                                                                                                                                                                                                                                                                                                                                                        |
|------------------------------------------------------------------------|--------------------------------------------------------------------------------------------------------------------------------------------------------------------------------------------------------------------------------------------------------------------------------------------------------------------------------------------------------------------------------------------------------------------------------------------------------------------------------------------------------------------------------------------------------------------------------------------------------------------------------------------------------------------------------------------------------------------------------------------------------------------------------------------------------------------------------------------------------------------------------------------------------------------------------------------------------------------------------------------------------------------------------------------------------------------------------------------------------------------------------------------------------------------------------------------------------------------------------------------------------------------------------------------------------------------------------------------------------------------------------------------------------------------------------------------------------------------------------------------------------------------------------------------------------------------------------------------------------------------------------------------------------------------------------------------------------------------------------------------------------------------------------------------------------------------------------------------------------------------------------------------------------------------------------------------------------------------------------------------------------------------------------------------------------------------------------------------------------------------------------------------------------------------------------------------------------------------------------------------------------------------------------------------------------------------------------------------------------------------------------------------------------|
| <p>Acyl-CoA oxidase 3<br/>(POX3) coding<br/>DNA<br/>(YALI0D24750g)</p> | <p>ATGATCTCCCCAACCTCACAGCTAACGTCGAGATTGACGGCAAGCAGTACAACACCT<br/> TCACAGAGCCACCCAAGGCGCTCGCCGGCGAGCGAGCCAAGGTCAAGTTCCCCATCAA<br/> GGACATGACGGAGTTTCTGCACGGTGGCGAGGAGAACGTGACCATGATCGAGCGACTG<br/> ATGACGGAGCTCGAGCGAGACCCCGTGTCAACGTGTGCGGGCGACTACGACATGCCCA<br/> AGGAGCAGCTGCGAGAGACGGCCGTGGCGCGAATTGCGGGCGTGTCCGGCCACTGGAA<br/> GAAGGACACAGAAAAGGAGGCGCTGTGCGGTCCCAGCTGCACGGCATTGTGGACATG<br/> GGCACCCGAATCCGACTCGGTGTGCACACGGGCCTGTTTCATGGGCGCCATCCGGGGTT<br/> CCGGCACCAAGGAGCAGTACGACTACTGGGTGCGAAAGGGCGCCGCGGACGTCAAGGG<br/> CTTCTACGGCTGCTTTGCTATGACCGAGCTGGGCCATGGCTCCAACGTGGCCGGTCTT<br/> GAGACCACCGCCACCTACATCCAGGACACGGACGAGTTCATCATCAACACCCCAACA<br/> CTGGAGCCACCAAGTGGTGGATTGGAGGAGCCGCCACTCGGCCACCCACACCGCCTG<br/> CTTTGCTCGTCTGCTTGTGACGGCAAGGACTACGGCGTCAAGATCTTTGTTGTCCAG<br/> CTGCGAGACGTCTTCTCACTCTCTCATGCCCGGCATCGCTCTCGGCGACATTGGAA<br/> AGAAGATGGGCCGAGACGCCATCGACAACGGCTGGATCCAGTTCACCAATGTGCGAAT<br/> CCCCGACAGAACATGCTCATGAAGTACGCCAAGGTCTCGTCTACCGGCAAGGTGTGCG<br/> CAGCCTCCTCTGGCCCAGCTCACCTACGGCGCTCTCATTGGCGGCCGAGTCACCATGA<br/> TTGCCGACTCCTTCTTTGTCTCCAGCGATTTCATCACCATTGCTCTGCGATACGCTG<br/> TGTGCGACGACAGTTTGGCACCACCCCGGCCAGCCCGAGACTAAGATCATCGACTAC<br/> CCCTACCATCAGCGACGTCTGCTGCCTTCTTGGCCTTCACCTACGCCATGAAGATGG<br/> CCGCCGACCAGTCCCAGATTAGTACGATCAGACCACCGATCTGCTGCAGACCATCGA<br/> CCCTAAGGACAAGGGCGCTCTGGGCAAGGCCATTGTGACCTCAAGGAGCTGTTTGCC<br/> TCTTCTGCTGGTCTCAAGGCCTTCACCACCTGGACCTGTGCCAACATCATTGACCAGT<br/> GCCGACAGGCCCTGCGGTGGCCACGGCTACTCTGGCTACAACGGCTTTGGCCAGGCCTA<br/> CGCCGACTGGGTTGTCCAGTGCACCTGGGAGGGTGACAACAACGTCCTGTGTCTGTCC<br/> ATGGGCCGAGGTCTCATCCAGTCGTGTCTGGGCCACCGAAAGGGTAAGCCTCTGGGCT<br/> CTTCTGTGCGGTACCTGGCTAACAAGGTCTTGAGCAGGCTACTCTGAGCGGCCGAGA<br/> CCTCAAGGACCCCAAGTTCTCATCGAGGCCTGGGAGAAGGTGCGCAACGGCGCCATC<br/> CAGCGGGCCACTGACAAATTTGTGAGCTCACCAAGGGCGGCCCTCTCTCCTGACCAGG<br/> CCTTTGAGGAGCTGTGCGAGCAGCGATTCCAGTGTGCCAAGATCCACACCCGAAAGCA<br/> CCTGGTGACTGCCTTCTACGAGCGAATCAACGCCTCTGCGAAGGCCGACGTCAAGCCT<br/> TACCTCATCAACCTCGCCAACCTCTTCACTCTGTGGTCCATTGAGGAGGACTCTGGTC<br/> TCTTCTGCGAGAGGGTTTCTGCGAGCCCAAGGACATTGACCAGGTGACTGAGCTGGT<br/> GAACCACTACTGCAAGGAGGTTGAGACCAGGTTGCCGGCTACACCGATGCCTTTGGT<br/> CTGTCTGACTGGTTCATCAACGCTCCCATTTGAAACTACGATGGTGACGTTTACAAGC<br/> ATTACTTTGCCAAGGTTAACAGCAGAACCCTGCTCAGAACCCCGACCTCCTTACTA<br/> TGAGAGCACTCTTCGACCTTTCCTGTTCCGAGAGGATGAGGATGACGACATTTGCGAG<br/> CTGGACGAGGAATAG</p> |
|------------------------------------------------------------------------|--------------------------------------------------------------------------------------------------------------------------------------------------------------------------------------------------------------------------------------------------------------------------------------------------------------------------------------------------------------------------------------------------------------------------------------------------------------------------------------------------------------------------------------------------------------------------------------------------------------------------------------------------------------------------------------------------------------------------------------------------------------------------------------------------------------------------------------------------------------------------------------------------------------------------------------------------------------------------------------------------------------------------------------------------------------------------------------------------------------------------------------------------------------------------------------------------------------------------------------------------------------------------------------------------------------------------------------------------------------------------------------------------------------------------------------------------------------------------------------------------------------------------------------------------------------------------------------------------------------------------------------------------------------------------------------------------------------------------------------------------------------------------------------------------------------------------------------------------------------------------------------------------------------------------------------------------------------------------------------------------------------------------------------------------------------------------------------------------------------------------------------------------------------------------------------------------------------------------------------------------------------------------------------------------------------------------------------------------------------------------------------------------------|

|                                                                        |                                                                                                                                                                                                                                                                                                                                                                                                                                                                                                                                                                                                                                                                                                                                                                                                                                                                                                                                                                                                                                                                                                                                                                                                                                                                                                                                                                                                                                                                                                                                                                                                                                                                                                                                                                                                                                                                                                                                                                                                                                                                                                                                                                                                                                                                                                                                                                          |
|------------------------------------------------------------------------|--------------------------------------------------------------------------------------------------------------------------------------------------------------------------------------------------------------------------------------------------------------------------------------------------------------------------------------------------------------------------------------------------------------------------------------------------------------------------------------------------------------------------------------------------------------------------------------------------------------------------------------------------------------------------------------------------------------------------------------------------------------------------------------------------------------------------------------------------------------------------------------------------------------------------------------------------------------------------------------------------------------------------------------------------------------------------------------------------------------------------------------------------------------------------------------------------------------------------------------------------------------------------------------------------------------------------------------------------------------------------------------------------------------------------------------------------------------------------------------------------------------------------------------------------------------------------------------------------------------------------------------------------------------------------------------------------------------------------------------------------------------------------------------------------------------------------------------------------------------------------------------------------------------------------------------------------------------------------------------------------------------------------------------------------------------------------------------------------------------------------------------------------------------------------------------------------------------------------------------------------------------------------------------------------------------------------------------------------------------------------|
| <p>Acyl-CoA oxidase 4<br/>(POX4) coding<br/>DNA<br/>(YALI0E27654g)</p> | <p>ATGATCACCCCAAACCCCGCTAACGACATTGTCCATGACGGCAAGCTCTACGACACCT<br/>TCACTGAGCCCCCAAGCTGATGGCTCAGGAGCGAGCTCAGCTGGACTTCGACCCTAG<br/>AGACATCACCTACTTTCTGGATGGCTCTAAGGAGGAGACCGAGCTGCTGGAGTCGCTC<br/>ATGCTCATGTACGAGCGAGACCCTCTCTTCAACAACCAGAACGAGTACGATGAATCGT<br/>TTGAAACACTGCGAGAGCGATCTGTGAAGCGAATTTTCCAGCTGTCCAAGTCCATCGC<br/>CATGGACCCCGAGCCCATGTCTTCCGAAAGATTGGGTTCCCTGGGTATTCTTGACATG<br/>GGAACGTATGCTCGACTGGGAGTCCACTACGCGCTCTTCTGTA ACTCCATCCGGGGCC<br/>AGGGAACCCCGATCAGCTCATGTACTGGCTGGACCAGGGAGCCATGGTCATCAAGGG<br/>CTTCTACGGCTGTTTTGCCATGACCGAAATGGGCCATGGATCTAACCTGTCCGCTCTG<br/>GAAACCATCGCCACTTTCGACAAAGAGACCGACGAATTTATCATTAACAGCCCCACG<br/>TTGGAGCCACAAAGTGGTGGATTGGAGGAGCCGCCACACTGCTACTCACACACTTGC<br/>CTTTGCCCGTCTTCAAGTAGACGAAAGGACTACGGTGTGAAATCGTTTGTCTACCT<br/>CTCCGAAACCTGGACGACCATTGCTGCGTCTTGAATCGCCACAGGTGATATTGGTA<br/>AGAAGATGGGTCGAGATGCCGTTGACAACGGCTGGATTCACTTACCAACGTCGGAGT<br/>GCCCCGAAACTACATGCTCATGAAGCATAACCAAGGTTCTTCGAGACGGTACCGTCAAG<br/>CAGCCGCCTTTGGCCAACTGACTTACGGATCTCTCATCACTGGACGAGTCCAGATGA<br/>CCACTGACTCTCACAATGTGTCAAAAAGTTCTCACCATTGCCCTGAGATACGCCAC<br/>CATCCGACGACAGTTCTCGTCAACTCCAGGAGAGCCCCGAAACCCGACTAATTGACTAC<br/>CTGTACCACCAAAGACGACTCCTGCCTCTTATGGCTTACTCTTACGCCATGAACTAG<br/>CTGGAGATCACGTCCGAGAGCTGTTCTTTGCATCCAGGAGAAGGCTGAGAGCCTCAA<br/>GGAGGACGACAAAGCCGGAGTTGAGTCTTACGTCCAGGATATCAAGGAGCTCTTCTCT<br/>GTTTCTGCTGGTCTCAAGGCTGCCACTACATGGGCTTGTGCTGACATCATTGACAAGG<br/>CCCGACAGGCGTGTGGAGGCCACGGATACTCTGCCTACAACGGCTTTGGACAGGCCTT<br/>CCAGGACTGGGTTGTCCAGTGCACCTGGGAGGGTGACAATACTGTTCTGACTCTATCT<br/>GCCGGCCGAGCTCTGATCCAATCTGCTCTCGTCTACCGAAAGGAGGGCAAACCTAGGTA<br/>ACGCCACGAAGTACCTCTCTCGGTCCAAGGAGCTTGCCAACGCCAAGAGAAACGGACG<br/>ATCCCTGGAAGACCCCAAGCTGCTCGTGGAGGCATGGGAGGCTGTCTCTGCCGGTGT<br/>ATCAACGCTGCTACTGACGCTTACGAGGAGCTCTCCAAGCAGGGAGTTTCTGTGACG<br/>AGTGCTTTGAGCAGGTGTCCAGGAGCGATTCCAGGCTGCCGAATCCACACTCGACG<br/>AGCTCTTATCGAGGCCTTCTACTCACGAATCGCCACTGCTGATGAGAAGGTGAAGCCT<br/>CATCTGATCCCTCTGGCCAACCTGTTTGGCCCTGTGGTCCATTGAGGAGACTCTGCTC<br/>TGTTCCCTGGCTGAGGGCTACTTTGAGCCTGAGGATATCATTGAGGTGACTTCTCTTGT<br/>CAACAAGTACTGCGGAATTGTTGAAAGAACGTTATTGGATACACCGATGCCTTCAAC<br/>CTGTCCGACTACTTCATCAACGCTGCCATTGGACGATACGACGGAGACGTGTACAAGA<br/>ACTACTTTGAGAAGGTCAAACAGCAGTACCCTCCTGAGGGTGGCAAGCCTCACTACTA<br/>CGAGGATGTCATGAAGCCCTTCCCTGCATCGAGAGCGAATTCCCGATGTCCCCATGGAG<br/>CCCGAGGATATTCAGTAA</p> |
|------------------------------------------------------------------------|--------------------------------------------------------------------------------------------------------------------------------------------------------------------------------------------------------------------------------------------------------------------------------------------------------------------------------------------------------------------------------------------------------------------------------------------------------------------------------------------------------------------------------------------------------------------------------------------------------------------------------------------------------------------------------------------------------------------------------------------------------------------------------------------------------------------------------------------------------------------------------------------------------------------------------------------------------------------------------------------------------------------------------------------------------------------------------------------------------------------------------------------------------------------------------------------------------------------------------------------------------------------------------------------------------------------------------------------------------------------------------------------------------------------------------------------------------------------------------------------------------------------------------------------------------------------------------------------------------------------------------------------------------------------------------------------------------------------------------------------------------------------------------------------------------------------------------------------------------------------------------------------------------------------------------------------------------------------------------------------------------------------------------------------------------------------------------------------------------------------------------------------------------------------------------------------------------------------------------------------------------------------------------------------------------------------------------------------------------------------------|

|                                                                        |                                                                                                                                                                                                                                                                                                                                                                                                                                                                                                                                                                                                                                                                                                                                                                                                                                                                                                                                                                                                                                                                                                                                                                                                                                                                                                                                                                                                                                                                                                                                                                                                                                                                                                                                                                                                                                                                                                                                                                                                                                                                                                                                                                                                                                                                                                                                                                            |
|------------------------------------------------------------------------|----------------------------------------------------------------------------------------------------------------------------------------------------------------------------------------------------------------------------------------------------------------------------------------------------------------------------------------------------------------------------------------------------------------------------------------------------------------------------------------------------------------------------------------------------------------------------------------------------------------------------------------------------------------------------------------------------------------------------------------------------------------------------------------------------------------------------------------------------------------------------------------------------------------------------------------------------------------------------------------------------------------------------------------------------------------------------------------------------------------------------------------------------------------------------------------------------------------------------------------------------------------------------------------------------------------------------------------------------------------------------------------------------------------------------------------------------------------------------------------------------------------------------------------------------------------------------------------------------------------------------------------------------------------------------------------------------------------------------------------------------------------------------------------------------------------------------------------------------------------------------------------------------------------------------------------------------------------------------------------------------------------------------------------------------------------------------------------------------------------------------------------------------------------------------------------------------------------------------------------------------------------------------------------------------------------------------------------------------------------------------|
| <p>Acyl-CoA oxidase 5<br/>(POX5) coding<br/>DNA<br/>(YALI0C23859g)</p> | <p>ATGAACAACAACCCACCAACGTGATCCTTGGAGGCAAGGAGTACGACACCTTCACCG<br/>AGCCTCCGGCCCAGATGGAGCTGGAGCGAGCCAAGACACAATTCAAGGTCCGAGACGT<br/>GACCAACTTCCTCACAGGCAGCGAGCAGGAGACTGCTGACCGAGCGAATCATGCGG<br/>GAGATTGAGCGAGATCCCGTTCTCAACGTCGCCGGCGACTACGACGCCGATCTTCCCA<br/>CCAAGCGACGACAAGCTGTTGAGCGAATCGGGGCTCTGGCCCCGATACCTGCCCAAGGA<br/>TTCCGAGAAGGAGGCCATTTTGCAGGCCAGCTGCATGGTATTGTGGACATGGGTACC<br/>CGAACCCGAATCGCCGTTCACTACGGTCTGTTTATGGGCGCCATTTCGTGGCTCAGGAA<br/>CCAAGGAGCAGTACGATTACTGGGTCGCCAAGGGCGCCGCTACTCTGCACAAATTCTA<br/>TGGCTGCTTTGCCATGACTGAGCTGGGTCACGGATCTAACGTGGCCGGTCTCGAGACC<br/>ACCGCCACCCTTGATAAGGACACCGACGAGTTCATCATCAACACCCCAACTCGGGAG<br/>CCACAAAGTGGTGGATTGGAGGAGCTGCCCACTCTGCTACCCACACGGCTTGTCTTGC<br/>CCGACTCATTTGTGATGGCAAGGACTATGGTGTAAAGATCTTCATTGTTTCAGTGCGA<br/>GACCTCAACTCCCACTCTCTACTCAACGGTATTGCCATTGGAGATATCGGCAAGAAGA<br/>TGGGCCGAGATGCCATTGATAATGGTTGGATCCAGTTCACAGACGTCCGAATTCCCCG<br/>ACAGAACATGCTCATGCGATACGACCGGGTGTCTCGAGACGGCGAGGTTACCACCTCC<br/>GAGCTTGCCCAGCTCACCTACGGAGCACTTCTGTCTGGCCGAGTGACCATGATTGCCG<br/>AGTCTCACCTCCTGTCTGCTCGGTTCCCTCACCATTGCTCTTCGGTACGCCGTGTATCCG<br/>TCGACAGTTCGGAGCTGTGCCTGACAAGCCCAGACTAAGCTCATCGACTACCCTTAC<br/>CACCAACGACGTCTGCTGCCTCTTCTGGCCTACACCTACGCCATGAAGATGGGCGCCG<br/>ACGAGGCCCAGCAGCAGTACAACCTCCTCCTTTGGCGCTCTTCTCAAGCTCAACCCGT<br/>CAAGGACGCTGAGAAGTTTGTGTGCGCCACTGCCGACCTCAAGGCTCTGTTTGCCTCT<br/>TCTGCCGGAATGAAGGCCTTACCACCTGGGCTGCCGCCAAGATCATTGACGAGTGCC<br/>GACAGGCCCTGTGGTGGCCATGGCTACTCCGGCTACAACGGTTTCGGTCCAGGCTTACGC<br/>CGACTGGGTCGTCCAATGCACTTGGGAGGGTGACAACAACGTGCTGTGTCTGTCCATG<br/>GGTCGATCGCTCATCCAGTCGTGCATTGCCATGAGAAAGAAGAAGGGCCATGTCCGCA<br/>AGTCGGTCCAGTACCTGCAGCGACGAGACGAGCTGCAGAATGCCGAGTTGACAACAA<br/>GCCTTCACTGACCCCTGCTGTGCTCATCACTGCATGGGAGAAGGTTGCCTGCGAGGCC<br/>ATCAACAGAGCCACTGACTCCTTCATCAAGCTCACCCAGGAGGGTCTGTCTCCTGACC<br/>AGGCCTTTGAGGAGCTGTCTCAACAGAGATTTGAGTGTGCGCGAATCCACACCCGAAA<br/>GCATCTGATCACCTCGTTCTACGCTCGAATCTCCAAGGCCAAGGCCGAGTCAAGCCC<br/>CACCTTACTGTTCTTGCCAACCTCTTTGCCGCTCTGGTCCATCGAGGAGACTCTGGTC<br/>TCTTCCCTCGGGAGGGCTGCTTCGAGCCTGCCGAGATGGACGAGATACCGCTCTGGT<br/>CGACGAGCTGTGCTGCGAGGCTCGAGAGCAGGTCATTGGATTACCGACGCCCTCAAC<br/>CTGTCCGACTTCTTATTAAACCCCCATTGGCCGATTTCGACGGAGACGCCTACAAGC<br/>ACTACATGGACGAGGTCAAGGCTGCCAACAACCCCTCGTAACACCCATGCTCCTTACTA<br/>CGAGACCAAGCTGCGACCCCTCCTGTTCCGACCCGATGAGGACGAGGAGATTTGCGAC<br/>CTGGACGAGTAG</p> |
|------------------------------------------------------------------------|----------------------------------------------------------------------------------------------------------------------------------------------------------------------------------------------------------------------------------------------------------------------------------------------------------------------------------------------------------------------------------------------------------------------------------------------------------------------------------------------------------------------------------------------------------------------------------------------------------------------------------------------------------------------------------------------------------------------------------------------------------------------------------------------------------------------------------------------------------------------------------------------------------------------------------------------------------------------------------------------------------------------------------------------------------------------------------------------------------------------------------------------------------------------------------------------------------------------------------------------------------------------------------------------------------------------------------------------------------------------------------------------------------------------------------------------------------------------------------------------------------------------------------------------------------------------------------------------------------------------------------------------------------------------------------------------------------------------------------------------------------------------------------------------------------------------------------------------------------------------------------------------------------------------------------------------------------------------------------------------------------------------------------------------------------------------------------------------------------------------------------------------------------------------------------------------------------------------------------------------------------------------------------------------------------------------------------------------------------------------------|

|                                                                        |                                                                                                                                                                                                                                                                                                                                                                                                                                                                                                                                                                                                                                                                                                                                                                                                                                                                                                                                                                                                                                                                                                                                                                                                                                                                                                                                                                                                                                                                                                                                                                                                                                                                                                                                                                                                                                                                                                                                                                                                                                                                                                                                                                                                                                                                                                                                                                |
|------------------------------------------------------------------------|----------------------------------------------------------------------------------------------------------------------------------------------------------------------------------------------------------------------------------------------------------------------------------------------------------------------------------------------------------------------------------------------------------------------------------------------------------------------------------------------------------------------------------------------------------------------------------------------------------------------------------------------------------------------------------------------------------------------------------------------------------------------------------------------------------------------------------------------------------------------------------------------------------------------------------------------------------------------------------------------------------------------------------------------------------------------------------------------------------------------------------------------------------------------------------------------------------------------------------------------------------------------------------------------------------------------------------------------------------------------------------------------------------------------------------------------------------------------------------------------------------------------------------------------------------------------------------------------------------------------------------------------------------------------------------------------------------------------------------------------------------------------------------------------------------------------------------------------------------------------------------------------------------------------------------------------------------------------------------------------------------------------------------------------------------------------------------------------------------------------------------------------------------------------------------------------------------------------------------------------------------------------------------------------------------------------------------------------------------------|
| <p>Acyl-CoA oxidase 6<br/>(POX6) coding<br/>DNA<br/>(YALI0E06567g)</p> | <p>ATGCTCTCTCAACAGTCCCTCAACACGTTTACCGAGCCCCGGTCGAAATGGCCCCGG<br/> AGCGAAACCAGACTTCCTTCAACCCGCGTCTGCTGACGTACTTTCTGGACGGAGGCGA<br/> AAAGAACACTCTGCTTATGGACCGACTGATGCAAGAGTACGAGCGAGACCCCTGTGTTT<br/> CGAAACGAGGGCGACTACGATATTACCGATGTGGCCAGTCGCGAGAGCTGGCCCTTCA<br/> AGCGAATCGCCAAGCTCATCGAGTATGTGCACACCGACGACGAGGAGACGTATCTGTA<br/> CCGATGCATGCTTCTGGGCCAAATCGATATGGGAGCCTTTGCCCGGTACGCCATCCAC<br/> CACGGAGTCTGGGGCGGTGCCATTCGAGGTGCAGGAACGCCTGAGCAGTACGAATTCT<br/> GGGTCAAGAAAGGATCTCTGTCGGTTAAGAAGTTCTATGGATCCTTCTCCATGACCGA<br/> GCTGGGCCACGGCAGTAAC TTGGTGGGTCTGGAGACCACCGCCACCCTGGACAAGAAC<br/> GCAGACGAGTTCGTGATCAACACTCCCAACGTTGCTGCCACTAAATGGTGGATCGGAG<br/> GAGCCGCCGATACCGCCACTCACACAGCTGTGTTTGCACGTCTCATTGTCGACGGAGA<br/> GGACCACGGTGTCAAGACGTTTGTGGTGCAGCTGCAGACGTGGAGACTCACAACCTG<br/> ATGCCTGGTATGCTATCGGAGACTGCGGCAAGAAGATGGGACGTCAGGGAACCGACA<br/> ACGGCTGGATCCAGTTCACCCATGTGCGAATTCGCCGACAGAACATGCTCATGCGATA<br/> CTGTACGTTGGACAGCGACGAAATGTTACCGAGCCCATGATGGCTCAGATGGCCTAC<br/> GGAGCTCTTCTGGCTGGCCGAGTCCGAATGGCCATGGACAGTTATTTACCTCGCGAA<br/> AGTTCCTTACCATTGCTCTTCGATATGCCACCATTTCGACGAGCTTTTGTGCCGGAGG<br/> AGGTCAGGAGACCAAGCTGATCGACTACCCTTACCACCAGCGACGTCTGCTCCCCCTC<br/> ATGGCCCAGACATATGCCATCAAGTGCACCGCCGATAAGGTCAGAGATCAGTTCGTCA<br/> AGGTCACCGACATGCTCCTAAACCTCGATGTTTCTGACCAAGAGGCCGTGCCAAGGC<br/> CATTGCCGAGGCTAAGGAGCTCTTCTCTGTTTCTGCTGGTGTCAAGGCTACCACAAC<br/> TGGGCTTGGCCACACACCATTGACCAGTGCAGACAGGCGTGTGGAGGCCACGGATACT<br/> CTGCTTACAACGGTTTTGGACGTGCTTACTCCGATTGGGTGATCCAGTGCACCTGGGA<br/> GGGAGACAATAACATTCTGTGCTGTGTCAGCTGGCAGAGCTCTGGTCCAGTCTAACCGA<br/> GCTGTCCGGGCTGGCAAGCCCATGGAGGTCCTACCACCCTACCTGGCTGCTCCCGCTG<br/> GTTCCCCAAGCTCGCTGGTCGAAACTTGTACGACCCCAAGGTCATGATTGGGGCCTG<br/> GGAGACTGTTTCCCGAGCTCTGATCAACCGAACCACCGATGAGTTTGAGGTGCTGGCC<br/> AAGAAGGGTCTGTCTACTGCCAGGCCTACGAGGAGCTGTCCAGCAACGATTCTGT<br/> GTACTCGAATCCACACCCGCTGTGACATGGTCAAGAACTTCTACGAGCGAATTGCCGA<br/> GGAGGGCACCGAGTTCACCAAGGAGCCTCTTACCAGACTTGCCAACCTGTACGCCTTC<br/> TGGTCCGTGCAAGAGGAGGCTGGAATCTTCTCCGAGAGGGTACATCACTCCCAGG<br/> AGCTCAAGTACATCAGTGCCGAGATCCGAAAGCAGCTCTGGAGGTGCGAAAGGACGT<br/> CATTGGCTACACCGATGCCTTCAACGTGCCTGATTTTTCTCAACTCTGCCATTGGA<br/> CGAGCTGACGGAGATGTCTACAAGAATACTTCAAGGTGGTCAACACTCAGAACCTTC<br/> CCCAAGACCCTCGACCTCCTTATTACGAGTCTGTCATTAGACCTTCTGTTCGGAAA<br/> GGACGAGGATGAGGAAATTTGCTCTCTTGAGGATGAGTAG</p> |
| <p>MFE1 coding DNA<br/>(YALI0E15378g)</p>                              | <p>ATGTCTGGAGAATAAGATACGACGGAAAGGTCGTCATTGTTACCGGTGCCGGTGGCG<br/> GTCTCGGTAAGGCATACGCCCTTTTCTACGGCTCTCGAGGAGCCTCTGTTGTTGTCAA<br/> CGATCTTGGTGGCGACTTCAAGGGCGACGGTCCCAGGCTGGCAGTGGCAAGCGAGTG<br/> AGTATCATTACAAGCGCAGCGAAGCGAAACGACCCAAAACGACACCACACAGAAGGAT<br/> AAACTAACACCAGGTTGCCGATGTTGTCGTCGACGAGATTGTTTCCAAGGGAGGCAAG<br/> GCTGTTGCTAACTACGACTCTGTCGAGAACGGTGACAAGATTGTCGAGACTGCCGTCA</p>                                                                                                                                                                                                                                                                                                                                                                                                                                                                                                                                                                                                                                                                                                                                                                                                                                                                                                                                                                                                                                                                                                                                                                                                                                                                                                                                                                                                                                                                                                                                                                                                                                                                                                                                                                                                                                                                                                                                                                |

AGGCTTTTGGCTCCGTCCACATTGTCATCAACAACGCCGGTATTCTCCGAGATATTTCTTCAAGAAGATGACCGACAAGGACTGGGATCTTGTCTACAAGGTCCACGTTTTCCGGTGCCTACAAGGTTACCCGAGCTGCCTGGCCTTACTTCCGAAAGCAGAAGTACGGTGCAGTTATCTCTACCTCTTCCGCTGCTGGTCTTTACGGAAACTTCGGCCAGACCAACTACTCCGCTGCCAAGCTCGCCCTGGTTGGTTTCCGGTGAGACTCTCGCCAAGGAGGGTGCCAAGTACAACATTACTTCCAACGTCATCGCTCCTCTTGTCTTCCGAATGACCGAGACAGTCATGCCCCGAGGATATCCTCAAGCTCCTCAAGCCTGAGTACGTTGTTTCTCTGGTCCGCTACCTCACCACGACTCTGTCACCGAGTCTTATGGTATTTACGAGGTCCGGTCTGGTTACATGGCTAAAATCCGATGGGAGCGAGGCAACGGTGCTGTTTTCAAGGGCGACGACACTTTACCCCGTCTGCTATTCTGAAGCGATGGGATGAGGTCACCTCTTTTGAGAGCCCACCTACCCTAACGGCCCTGTGACTTCTTCAAATACGCTGAGGAGTCTGTTAAGCGACCCGAGAACCCCCAGGGACCCACCGTCTCCTTCAAGGACCAGGTTGTCATTGTCACTGGAGCCGGTCTGGCATTGGCCGAGCTTACTCTCACCTCCTTGCTAAGCTTGGTGCCAAAGGTCGTTGTTAACGATTTCCGGTAACCCTCAGAAGGTTGTCGATGAAATTAAGGCCCTCGGTGGTATCGCCGTCGCTGACAAGAACAACGTCATCCACGGTGAGAAGGTTGTTTCCAGACCGCTATCGACGCTTCCGGTGCTGTCCACGCCGTTGTCAACAACGCTGGTATTCTCCGAGACAAGTCTTTCGCCAACATGGATGATGAGATGTGGCAGCTGATCTTTGATGTCCACTCAACGGTACTTACTCCGTTACCAAGGCCGCTGGCCCCACTTCCTTAAGCAGAAGTACGGCCGTGTCATCAACACCACCTCAACTTCTGGTATCTACGGTAACTTCGGCCAGGCCAACTACTCTGCCGCAAGGCTGGTATCCTCGGTTTCTCCGAGCTCTTGCTCGAGAGGTGAGAAGTACAACATTCTTGTCAACACCATTGCCCTAACGCTGGTACTGCCATGACTGCTTCTGTCTTCACTGAGGAGATGCTCGAGCTTTCAGCCCGATTTTCATCGCACCATCACCGTCTGCTTGCTTCCGATCAGGCTCCCGTACCCGGTATCTGTTTGAGACTGGTCTGCTTGGATCGGACAGACTCGATGGCAGCGAGCTGGTGGTAAGGCCTTCAACAACAAGAAGGGTGTCAACCCCGAAATGGTTCGAGACAGCTGGGCTAAGATCGTCCGACTTCGATGATGGTAACTCCACCCATCCACCCTCCCTCCGAGTCTACTACTCAGATTCTTGAGAACATCTTCAACGTGCCTGATGAGGAGGTTGAGGAGACTGCTCTCGTTGCTGGTCCGGTGGTCCCGGTATCCTCAACAAGGAGGGCGAACCTTTGACTACACTTACTTACCAGACCTCATTTTACAACCTTGGTCTCGGTGCCAAGGCTAATGAGCTCAAGTATGTCTTCGAGGGTATGATGACTTCCAGACCGTGCCACTTTCGGTGTATCCCTTACATGGGTGGCCTCATCACTACCAACTATGGCGACTTCGTTCCTAACCTTCAACCCTATGATGCTTCTCCACGGTGAGCAGTACCTTGAATCCGACAGTGGCTATTCTTACCATGCTACATTGGAGAACAAGGCTAAGGTCATCGATGTCGTTGACAAGGGCAAGGCTGCCCTCCTGTCTACTGCTACCACCACGAACAAGGAGACTGGTGAGGAGGTTTTCTACAACGAGTCTTCTCTTTCATCCGAGGCTCTGGTGGTTTCGGTGGTAAGTCTACCGTACTGACCGTGGCGCTGCCACTGCTGCCAACAAGCCCCCTGCTCGAGCTCCTGACTTCGTTAAGGAGATCAAGATCCAGGAGGACCAGGCTGCCATTTACCGACTTCTGGTGATTACAACCTCTTACATCGACCCTGCTTTTGTGCTGTTGGTAACTTTGACCGACCTATTCTCCACGGTCTCTGCTCTTTTGGTGTCTCCGGTAAGGCTCTTTACGATCAGTTTGGTCTTTTCAAGAACGCTAAGGTCGATTTGTGGTACGCTTCCCTGGTGAGACCCTGAAGGTTGAGGGCTGGAAGGAGGGCAACAAGGTCATTTCCAGACCAAGGTTGTTGAGCGAGGTAACCGCCATCAGCAATGCCGCCATTGAGCTCTTCCCAAGGATGCTAAGCTCTAA

|                                           |                                                                                                                                                                                                                                                                                                                                                                                                                                                                                                                                                                                                                                                                                                                                                                                                                                                                                                                                                                                                                                                                                                                                                                                                                                                                                                                                                                                                              |
|-------------------------------------------|--------------------------------------------------------------------------------------------------------------------------------------------------------------------------------------------------------------------------------------------------------------------------------------------------------------------------------------------------------------------------------------------------------------------------------------------------------------------------------------------------------------------------------------------------------------------------------------------------------------------------------------------------------------------------------------------------------------------------------------------------------------------------------------------------------------------------------------------------------------------------------------------------------------------------------------------------------------------------------------------------------------------------------------------------------------------------------------------------------------------------------------------------------------------------------------------------------------------------------------------------------------------------------------------------------------------------------------------------------------------------------------------------------------|
| <p>POT1 coding DNA<br/>(YALI0E18568g)</p> | <p>ATGGACCGACTTAACAACCTCGCCACCCAGCTCGAGCAGAACCCCGCCAAGGGCCTCG<br/> ACGCTATCACCTCCAAGAACCCCGATGACGTTGTCATCACCGCCGCCTACCGAACTGC<br/> CCACACCAAGGGAGGCAAGGGTCTGTTCAAGGACACCTCTTCTCCGAGCTGCTCGCC<br/> TCTCTGCTGGAGGGCCTCGTCAAGGAGTCCAAGATCGACCCCAAGCTCATCGGTGATG<br/> TCGTCTGCGGGAACGTTCTCGCTGCCGGTGCCGGTGCCACTGAGCACCGAGCTGCCTG<br/> CCTTGTTGCCGGCATCCCCGAGACCGTTCCTTCGTGCTCTCAACCGACAGTGTCTCC<br/> TCTGGTCTGATGGCCGTCAACGACGTTGCCAACAAGATCCGAGCCGGCCAGATTGACA<br/> TTGGTATCGGCTGTGGTGTGAGTCCATGTCCAACCAGTACGGTCCCAACTCCGTAC<br/> CCCCTTCTCCAACAAGTTCAGAACAACGAGGAGGCTAAGAAGTGCCTGATCCCCATG<br/> GGTATCACTTCCGAGAACGTTGCCGCAAGTACAACGTGTCCGAAAGGCCAGGACG<br/> CCTTTGCTGCCAAGTCTACGAGAAGGCCGCGCTGCCAGGCCGCGGCAAGTTCGA<br/> CCAGGAGATCCTCCCCATCAAGACCACTGTTCTCGATGATGATAACGAGAAGGAG<br/> GTTACCGTCAACAAGGACGACGGTATCCGACCTGGTGTACCCGCCGAGAAGCTCGGCA<br/> AGCTCAAGCCTGCTTTCTCCGCCGAGGGAACCCACGCTGGTAACGCCCTCTCAGAT<br/> CTCCGACGGTGCCGGAGCCGTTCTCCTCATGCGACGATCTGTTGCCGAGAAGCTTGGC<br/> CAGCCCATCCTTGCCAAGTTTGTCCACTGCAAGACCGTCCGGTGTCCCCCGAGCTCA<br/> TGGGAATTGGCCCCGCTTACGCCATTCTGTGTCCTTGAGGACCTTGGTCTGACCGT<br/> CAACGACGTTGACGTTTTTCGAGATCAACGAGGCTTTCGCTTCCAGGCTCTGTCTCC<br/> ATCCAGCATTGTGGAATCGACGAGTCCAAGGTCAACCCCGAGGTGGTGCCATTGCTA<br/> TTGGCCACCCTCTGGGAGCCACCGGTGCTCGACAGTTTGCCACTCTGCTCTCCGAGCT<br/> TAAGGAGTCTGGCAAGAAGTCCGGTGTACCTCCATGTGCATTTGGTACCGGTATGGGT<br/> GCCGCTTCTCTGGTTGTTGCCGAGTAA</p> |
| <p>Ku70 coding DNA<br/>(YALI0C08701g)</p> | <p>CCTACTGCAAACCTGTAATATTGAGATTATTGAGGAAATTAAGGAAAATTCAGATCAGA<br/> TTTGAGAGCAAAGTCCAACAATACTACACAATCCCTTTCCTGTATTCTCCACCATCGTCATC<br/> GTCGTCTGTCTTCTTTCAGCTTTTTAATTTACTCCCCACAAACCAAAATTTAGCTGCATCA<br/> TTCATCAACCTCCAATTATAACTATACTCGCGACACGAACACGAAACACGAACCACGAAC<br/> CGCCGCTTTTTGAAAATGGAATGGATTTACATCTGGAGAACGATGACGATGTGCTGGAAT<br/> CGAGGACTACAAGGTGCGCAAGGACGCGTGTGATCGCCATTCAAGTAACCCAGAACGCC<br/> ATTAACAACGAACTTTCATAAGGCCTTGAGGGCAGCCTTCGATGCTGTGACTGACAGAAT<br/> CGTCATATCGCCGAAGATTACACGGCGTTATGCTGTTCCGGTGCCTCCATGCAGTCTGAGG<br/> ACGACGGTACGAGTTCGATGATGAGTACAGATACACATTTCAATCTCAAGTGGGCCTTCCT<br/> ACCGTGTCTCAGATCAAACGACTCAAACGACTGGCAGAGGACCCTGATCTGGGTGAGAGGT<br/> TCAAGGTGCAGGAAGAGCCTCACCTGATGGACGTGTTTTTCGACATGAACCGCCATTTTATC<br/> AACATGGCACCCAACCTTCGCGTCCAGACGAATCATCTATATCACAGACGACGATACCCCA<br/> CGACGAATGAGGACGATATCAACAAGACACGAGTTCGAATTGAGGATCTAAGCCATCTCAA<br/> GGTGAAGGTGCGAGCCTTTTTGATCAACCCCTCGGAAGACAAGACGTTTCGACTCTCCAAAT<br/> TCTACGCTCTTGTGTTCAACGAAGACACATCTGTGGAGCCGGTTGAGGCGATCGATTTGAAG<br/> CAGTTTATCAACAAAAGAAACGTGCTCAATCGATCACTGTTCAATGTCAAAATGGAATCG<br/> GAGAAGGTCTTGTGTCGGAGTAAGAGGATACCTTCTTTATGCGGAACAAAAGGCTACTTCA<br/> ACAACCCGAAAGGCCTGGGTTTACTGAGGTGAGAAACCCGAGATTGCCAAATAGAAT<br/> CGCAGGCCGTCCTATTGAAAGTGGCAGAAGCGTGGACAAGGCAGATCTGAGAAAGACTTT<br/> CAAGTTTGGAAATGACTATGTTCTTTCACAGAAGAACAGCTGACGCAATCCGGTACTTTG</p>                          |

|                 |                                                                                                                                                                                                                                                                                                                                                                                                                                                                                                                                                                                                                                                                                                                                                                                                                                                                                                                                                                                                                                                                                                                                                                                                      |
|-----------------|------------------------------------------------------------------------------------------------------------------------------------------------------------------------------------------------------------------------------------------------------------------------------------------------------------------------------------------------------------------------------------------------------------------------------------------------------------------------------------------------------------------------------------------------------------------------------------------------------------------------------------------------------------------------------------------------------------------------------------------------------------------------------------------------------------------------------------------------------------------------------------------------------------------------------------------------------------------------------------------------------------------------------------------------------------------------------------------------------------------------------------------------------------------------------------------------------|
|                 | <p>GAGAGCCAATTATTTCGAATTCTCGGCTTCCACAATTCCTCGGACTTCTCCGAGCTTTCATCC<br/> ACAGTGTCGGATCGTCAATGTTCTATATCCCAGTATGAGAAGCTTGTGGGTTCGATTGCGA<br/> GCCTTTTCAGCACTCTATCAGAGTCTCAAGAACAAGGATAAGATGGCTCTGGCCTGGGTAT<br/> TGTCGCAAGGGCGCCAAACCTATTCTGGCTCTTCTTATTCTTCAACTAAGGAGATCGAAG<br/> GTCTTCATATGGTCTTCTTGCCTTTTACAGATGATATTCGACAAGAACCAAAGACTGAACTT<br/> GTGTCTGCCGCCCTGAGCTCGTGGACGCAACCAAGAATATTTTCACTCGTCTACGCATGCC<br/> TGGCGGATTTGAGTCGCAAAGATACCCCAACCCCGTCTACAGTGGCATTACCGAGTTGTAC<br/> GAGCCATGGCCCTTCAGGAGGAGGTTCCCAAGGTACCCGAAGACAAGACGACACCAAAGTA<br/> TCGGTCTATTGATACTCGAGTTGGTGATGCCATCGAGGAATGGAACAAGGTGTTGCGAGAGC<br/> AGCTCCAAGCGACCTGCGGAGGATATCTGTAAGGCTGAGAAGAAAGTCAAGAGTTCTGACG<br/> CGGGCCCTCCGTCCAACGAGCAAATGCAAAAATATGGTTGAGAATGACATTGTCCGCAAGCT<br/> GACCGTCGCAGAACTCAGGGCTTGGGGTGCTGCTAACAAATGTTGAGCCCAATGGTAGCAAG<br/> TTGAAGAAGGACTGGGTTGAGGTGGTCAAAAAGTACTATGGGAAGTGACTAGGGAGGCAC<br/> ATCTAAACGAATAACGAATATTAATGATACCATCATATCTCAGAACATGTATGACTGCTGCT<br/> TCCAAACGATATGAGGATGAGTCTCTTTCAGATTAAGATAGAGTACAAATATATTATCTAT<br/> ATACTGGTGTCTGTGCGATGTCGTATGAGCGGTGAATCATGTGACTGTCACGTGGTTTGGCC<br/> CAAGTTACCCGTAGCTACGCCTTTCTTGACCGTCTCCATGGTCTTCTGGGCGGGTTGACAG<br/> TTTC</p> |
| TEF Promoter    | <p>AGAGACCGGTTGGCGGCGTATTGTGTCCAAAAACAGCCCCAATTGCCCAATTGACC<br/> CCAAATTGACCCAGTAGCGGGCCCAACCCCGGCGAGAGCCCCCTCACCCACATATCAAA<br/> CCTCCCCGGTCCACACTTGCCGTTAAGGGCGTAGGGTACTGCAGTCTGGAATCTACGCT<br/> TGTTCACTTTGTACTAGTTTCTTTGTCTGGCCATCCGGGTAACCCATGCCGGACGCAAAA<br/> TAGACTACTGAAAATTTTTGTCTTTGTGGTTGGGACTTTAGCCAAGGGTATAAAAGACCAC<br/> CGTCCCCGAATTACCTTCTCTCTTTTCTCTCTCTCTCTCTCTGCAACTCACACCCGAAATCGTT<br/> AAGCATTCTCTGAGTATAAGAATCATTCAA</p>                                                                                                                                                                                                                                                                                                                                                                                                                                                                                                                                                                                                                                                                                                                                                     |
| cyc1 Terminater | <p>TCATGTAATTAGTTATGTCACGCTTACATTCACGCCCTCCCTCCACATCCGCTCTAACCGAAA<br/> AGGAAGGAGTTAGACAACCTGAAGTCTAGGTCCCTATTTATTTTTTATAGTTATGTTAGTAT<br/> TAAGAACGTTATTATATTCAAATTTTTCTTTTCTGACAGACGCGTGTACGCATGTA<br/> ACATTACTGAAAACCTTGCTTGAGAAGGTTTTGGGACGCTCGAAGGCTTTAATTTGC</p>                                                                                                                                                                                                                                                                                                                                                                                                                                                                                                                                                                                                                                                                                                                                                                                                                                                                                                                              |
| TEFin Promoter  | <p>AGAGACCGGTTGGCGGCGCATTGTGTCCAAAAACAGCCCCAATTGCCCAATTGACC<br/> CCAAATTGACCCAGTAGCGGGCCCAACCCCGGCGAGAGCCCCCTCACCCACATATCAAA<br/> CCTCCCCGGTCCACACTTGCCGTTAAGGGCGTAGGGTACTGCAGTCTGGAATCTACGCT<br/> TGTTCACTTTGTACTAGTTTCTTTGTCTGGCCATCCGGGTAACCCATGCCGGACGCAAAA<br/> TAGACTACTGAAAATTTTTGTCTTTGTGGTTGGGACTTTAGCCAAGGGTATAAAAGACCAC<br/> CGTCCCCGAATTACCTTCTCTCTTTTCTCTCTCTCTCTCTCTGCAACTCACACCCGAAATCGTT<br/> AAGCATTCTCTGAGTATAAGAATCATTCAAATGGTGAGTTTTCAGAGGCAGCAGCAATT<br/> GCCACGGGCTTTGAGCACACGGCCGGGTGGTCCCATTCCCATCGACACAAGACGCCACG<br/> TCATCCGACCAGCACTTTTGCAGTAC</p>                                                                                                                                                                                                                                                                                                                                                                                                                                                                                                                                                                                                                       |

|                        |                                                                                                                                                                                                                                                                                                                                                                                                                                                                                                                                                                                                                                                                                                                                                                                                                                                                                                                                                                                                                                                                                                                                                                                                                                                                                         |
|------------------------|-----------------------------------------------------------------------------------------------------------------------------------------------------------------------------------------------------------------------------------------------------------------------------------------------------------------------------------------------------------------------------------------------------------------------------------------------------------------------------------------------------------------------------------------------------------------------------------------------------------------------------------------------------------------------------------------------------------------------------------------------------------------------------------------------------------------------------------------------------------------------------------------------------------------------------------------------------------------------------------------------------------------------------------------------------------------------------------------------------------------------------------------------------------------------------------------------------------------------------------------------------------------------------------------|
| xpr2 Terminater        | <p>GATCCAACACTACGGAACCTGTGTTGATGTCTTTGCCCCGGCTCCGATATCATCTCTGCCTCTT<br/> ACCAGTCCGACTCTGGTACTTTGGTCTACTCCGGTACCTCCATGGCCTGTCCCCACGTTGCCG<br/> GTCTTGCCCTCTACTACCTGTCCATCAATGACGAGGTTCTCACCCCTGCCAGGTCGAGGCT<br/> CTTATTACTGAGTCCAACACCGGTGTCTTCCCACCACCAACCTCAAGGGCTCTCCCAACGC<br/> TGTTCCTACAACGGTGTGGCATTAGGCAATTAACAGATAGTTTGCCGGTGATAATTCTC<br/> TTAACCTCCCACACTCCTTTGACATAACGATTTATGTAACGAACTGAAATTTGACCAGATA<br/> TTGTTGTAATAGAAAATCTGGCTGTAGGTGGCAAAATGCGGCGTCTTTGTTCAATTC<br/> CCTCTGTGACTACTCGTCATCCCTTATGTTTCGACTGTCGTATTTCTATTTCATACATATG<br/> CAAGTGAGATGCCCGTGTC</p>                                                                                                                                                                                                                                                                                                                                                                                                                                                                                                                                                                                                                                                                                                       |
| SQS1up homology arm    | <p>AGCAGATGCGTGAGAGATTACCAAGAACGTGGTTTTCTCAAACAAGACAGCTTCTGGGCTT<br/> CGGAAATTCGGCGAAAGACTTGAGATGGTTCTGGATAGCGGTCATGTTGGGAATCAGCGA<br/> ACATACAATGCTGGACCAGGCCTGTACAGCGATTATCCAGATGGAAGTCTGGAAGCCT<br/> CTAATGGTGAACCCAAACGGCACCGGTGTCTCCAGGGTTTTATCATGGTATTGAAGAT<br/> CTCGTCTCGCTTATTGAGCTGCATAAGGTCCATCTTGTGTAGAAGCACAAATACCTTGGCGT<br/> CGGGCTGAACTCTCGCAGGTTCTTGATGCATTTCTGAAAGATGTCGATGTCCTTGGCGAGC<br/> TTTTTGAACCCACGTCAATACATGGATCAGAACCTCAACCATGCGAAATATGTGATCTTT<br/> TTGTGTTGAAAAATAGTTGTGCATGAAAACGTCTGACCACCACAATCCCAAGTTCAGGG<br/> TCATGTGGCCTAGAAAATCGCAAATGTGAATGCTCCACATCGATCGTGGCGCCAGACGGG<br/> TGTGTCAAAGCTGAGTAGTTGCTGAAAATGATTGATCGCATCGAGGATTGCCAGAGCCA<br/> GACCGGCCATAAGCAGCAGCTTTTTTCGAGAACTCCGGCCATTGATATCAGTTTCCTAAG<br/> AGTTGTGTGCTCGTGTGGGGTGTATGTACTGTAGTGTACTGGATGACTTTAGATTGCC<br/> ACTGATTAAGGTTGAGAGTTGGGGGAGCTATCGTACTCGCCGAGTAATACTATCTGTTACT<br/> CGAACAGTGTTCGGGGTTGACCTGATCCTCTCAGCGGCTGAGAATGGCAAAGCCTATCTGT<br/> TTTACTTCGGGGTTATGTACTGTATATGATTTTTCTTCAATTACAATTATCTATCTCGGGC<br/> ATTCTCGCCTCATTACTAAGCAACGTTACCAATCCATGAGTTTGTAGTGTCTATCAGGAT<br/> CATTCCAAAACATGAGAAAGGGTCTGGTCAAGAATCCCAGCCAAGTATTCTAATCA<br/> GAGTGAAATACGACTTACGGTAAAAAGTACATGTAAGTGAACGATACTTGTAAATTCGTATATG<br/> AACAGCCGTATATAGTCGTTCTGCTCGGGTAGATCGTGTGCTAAT</p> |
| SQS1 down homology arm | <p>GGACACAACTCGCTTGTTCACCAACTTCGAACCACCACTTTCAGCCACCATGGGAAAACCT<br/> ATCGAACTGCTCTTGCACCCTAGCGAACTGTCTGCTGCTATCCACTACAAGCTGTGGCGTCA<br/> GCCTCTGCATCCCCGCGATCTTCCAAGGAGTCCACTGAGCTGCGACGATGCTATGAGCTTC<br/> TAGACGTGTGCTCAGCATATTTGCAGCCGTTATTCGAGAAGTGCATCTGAGGTGCGAGAC<br/> GCTGTAATGCTGTTCTATCTGATTCTTCGTGCTCTCGACACGATTGAAGACGATATGACTCTG<br/> TCGCGTGACATCAAGATCCCAATTCTTCGAGACTTCACGAAGTGCATGAAGACACCTGGCTG<br/> GAAGTTCACCGACTCTGATCCCAACGAGCGAGATCGTGTGGTGTACAGGAGTTTCTGTGG<br/> TTATGACTGAGTTCAACAAGCTCAAGCCCAAGTACCAGGAAGTAATCTACGACATTACCGA<br/> CAGAATGGGAAACGGAATGGCCGATTACGTCATTGATGACGACTCAACAACAACGGCGTG<br/> GACACATTGCCGTTATGATCTGTACTGTTCATCATGTTGCCGGCATCGTGGGTGAGGGCCT<br/> TACCCGAATTACGATTCTCGCTGGTTTTGGAACCGACGTGTTGCACGAAAACCCCGACTTC<br/> AGGAGTCTATGGGCTGTTCTTGCAAAAGTCAACATCATCCGAGACTACAGAGAAGACAT<br/> TGACGTGAACAGAGCTTCTGGCCTCGAGAAATCTGGCACAAGTACGCCGAAGAAATGCCA<br/> GATTTCAAGGACCCGAAGTATCCAAGAAGGCCTTGCATTGCACCTCCGATCTGGTTGCAAA</p>                                                                                                                                                                                                                                                                                                               |



|                        |                                                                                                                                                                                                                                                                                                                                                                                                                                                                                                                                                                                                                                                                                                                                                                                                                                                                                                                                                                                                                                                                                                                                                                                                                                                                                                                                                                                                                                                                                                                                                                                          |
|------------------------|------------------------------------------------------------------------------------------------------------------------------------------------------------------------------------------------------------------------------------------------------------------------------------------------------------------------------------------------------------------------------------------------------------------------------------------------------------------------------------------------------------------------------------------------------------------------------------------------------------------------------------------------------------------------------------------------------------------------------------------------------------------------------------------------------------------------------------------------------------------------------------------------------------------------------------------------------------------------------------------------------------------------------------------------------------------------------------------------------------------------------------------------------------------------------------------------------------------------------------------------------------------------------------------------------------------------------------------------------------------------------------------------------------------------------------------------------------------------------------------------------------------------------------------------------------------------------------------|
|                        | <p>TGCCCTCGGACATGCCACAGACTGCCTCGATTACCTCGACAACGTCACCGATCCTTCAACCT<br/> TCACTTTCTGCGCCATTCCCAGGTCATGGCCATTGCTACCCTGGACTTGGTCTACCGAAACC<br/> CCGACGTTTTCCAGAAGAACGTCAAGTTGCGCAAGGGAAGTACTGTCAGCCTGATTCTTGAG<br/> GCCAGCAACGTTTTCTGGAGTATGTGACATTTTCACTCGATACGCCCGGAAGGTGTACAAGAA<br/> GTCCGACCCCAATGACCCCACTACTCCGAGTGTCTGTGCTCTGCGGTAAGATCGAGCAGC<br/> ATGCGGCTCTGATCAAGAGACAGCGAGGACCCCGCTAAAACCATTGCACAACCTGGAAGG<br/> TGAACGAAAAGAGATGGCCCTGTCGCTAATTGCTGTTTAGCAGTTATCTTCTCGATGCTG<br/> GACTGATGGCTTATATCGCCTACGTGCTGGATTACAGATGGTCACCCCGAGAGATTTTCGAC<br/> TCTAAGATGTTTCTCTGAGAGATTAG</p>                                                                                                                                                                                                                                                                                                                                                                                                                                                                                                                                                                                                                                                                                                                                                                                                                                                                                                                                                                                             |
| IntC up homology arm   | <p>AGGTTGTCGATGATATGCTGGACTACTCCGAGGGCGAGTCTCATCTTGGTAAGCCCGCTGGA<br/> GCCGATCTCAAACCTGGTCTTGCCACTGCGCCCGTTCTGTTTGGCTGGGAAAAGTACCCCGA<br/> GCTCGGAGACATGATCAAGCGAAAGTTTGACGGTCCCGGCGACGTGGAGCGGGCCCGATT<br/> CTGGTTCAGCAGGCAGACGGTCTGTCGGAACCCGAGAGCTGGCCAAAAGTACTGCGACG<br/> AGGCTGTCGCCAACTTGGACCTGCTTCCCTACTCTGAGAGCAGAGAGGCTCTGAGAAACCTC<br/> ACCATGAAGATGATGAACCGAAGCAAGTAATGTATATAGAGCATAGATTGAAAAGCAGGA<br/> CAGGAGGATGGGAGAGGACGCAGCTCTACTGTAGTTACAAGACGGTGAGTACGGTACTACC<br/> ACAGTGTAGCTAGTAGAGGTTGGGTAGCATGGTGTAGAAGACGAGGACCAGTGGTGAGTTG<br/> TACTTCAACGCAAAGTAGTAACTAGGTGATAGATTGATATTATATCTACTACTGTAATTGTA<br/> CTTGTACTTTAGTGATACAGCATGCTCCTGAAATTTACTATACTCTGTCAGATCACTCGATCT<br/> ACACACTCAGGATAGGGGATAGAGCACAAGCAGATGAGTAGTTGGACATTATTTTCGAGAAA<br/> TTTCTTTACAGGATATATTCCAACAAGTTACAAAACCATTTCTGTGACTTTTCTGATTTCGC<br/> CTCCGCCATTACTAATCACCTACAAGTACACTACATCTCATTGTGCAGGCAAACCTCAGTTG<br/> TATCTGATCAACTACACTATGGTGTACCGATTGTCATCGGAGTGGGAGTCACGTTGGTGGC<br/> GTTAGGGGTGAGTAAAGACGGACAAACAACCACGACATGTGTACTAACTACAGCTGCGGG<br/> CCGGATTACGTGCGCGAGCCCGATACAGCGGGGTTCTGAGACGCTGCTCAACAGCAGGCA<br/> TTATCTGGGCGGATTCCAGCATAATATGAGTCGCAAGGAGGCGCTGTTGATCTGGGGTTG<br/> CCCGGAAACACGGCTCGGTGACGCTCAACATGCTCAAGGACAAGCATCGAAAGGTGATGAT<br/> GCTGAATCACCCGATCGAGGCGGATCACCGTTTATGGCCAAGAAAATCAACGAGGCCAAG<br/> GATATGCTGAAAAGGAGGTAATAAAGTGAAGCAGCAGAGAAATCTTCATCGGTGGACAG<br/> CCAGCATCACCATAGACGTGTTGTCCACTTTTAATTGTATATAATTTAACTATTTTATGACCTA<br/> GGAGTGGGTCTATAGATGCGGTAAGTGTGACCAAAGACACTGAGATAGGGCGTACGA<br/> GATGGGTTTTGGTATAAAAAGAGAAGGACTATGTCTCAGGAGTTGCTCT</p> |
| IntC down homology arm | <p>CGTGGTTCATGTCCTTCATCTGGATCGAGATCCTCTTCCAGCTGCCCTTCTTTGTTTATGGAG<br/> CCTACAAGCTGCTAACCAAGACCGCCACTCCCACGACATACCTGTGGATGCTGGTGTACGGT<br/> GTCAATGCCAGCCTAACGACTCTGGCATGTCTCGCGGAGGTGTGGGCTCGAGCCGGTCTTAC<br/> CGATGCCCTTCGATACAACCTGCTCGCTGTCTACGCCCTTTTTCTTCATTTCTGGCTACAT<br/> TGTCATTGACGTATTCCAGCGGTTGCAGGGAGAGCTGAGAAAAGTCAAGACTGATTAAGCA<br/> ACGAATTACTATAACCAAACCGCCAAACAAGTGTGCCACACGACTCACGCAGGAATGTAC<br/> CGCATACTATGTAAGTGTACTGTTCTGGCAATACCCAATGGTTCAGTTTCCAACATCCTCG<br/> ACTAAGAAGGAACTACTGTATTGAACTGTACTGGTGTGACGACTTGTGTGTTTATTGTC<br/> AATGAGATTGGACTCGGTTACTTACTCTCCGGGCACTACAAGTACCGTACCTCAAGTCTCTG<br/> TGTGATATATATTACCGTATTATGATTTCAAACCATTTACATTGTAAGTCTCTCTCAATTGA</p>                                                                                                                                                                                                                                                                                                                                                                                                                                                                                                                                                                                                                                                                                                                                                                                                                                                                                       |

|                                 |                                                                                                                                                                                                                                                                                                                                                                                                                                                                                                                                                                                                                                                                                                                                                                                                                                                                                                                                                                                                                                                                                                                                                                                                                                                                                                                                                                                                                                                                                                                                                                                                                                                                                                                                  |
|---------------------------------|----------------------------------------------------------------------------------------------------------------------------------------------------------------------------------------------------------------------------------------------------------------------------------------------------------------------------------------------------------------------------------------------------------------------------------------------------------------------------------------------------------------------------------------------------------------------------------------------------------------------------------------------------------------------------------------------------------------------------------------------------------------------------------------------------------------------------------------------------------------------------------------------------------------------------------------------------------------------------------------------------------------------------------------------------------------------------------------------------------------------------------------------------------------------------------------------------------------------------------------------------------------------------------------------------------------------------------------------------------------------------------------------------------------------------------------------------------------------------------------------------------------------------------------------------------------------------------------------------------------------------------------------------------------------------------------------------------------------------------|
|                                 | <p>CTGATTCATATAGAACTACCAGTAGAAGCATCTCCGAAGGTGTGTTTTTTCTAGTACCGTA<br/> TGTACAGTATTCATACTAGTTAGCTACAGTACATAACGCGCGCCAGGCTAACATCATCACG<br/> GAACAACCTGTACTIONTATTAGAGCCGAAATTTGAACAGAAAACAAAAAGAATTGAATTT<br/> CCCATATTCCAGTCACTACTGGGAATCTTACCAACATAAAAAACACCCACCTTGACGTCT<br/> ATCACGTGCTTCATTCATACCGTTATTCTGGCTCTTCCCACACCCCACTTTTACATTAACC<br/> TTGATGTCCGCCAAACTCTTTTTCTGCACGCTCCCTTAACCTCGGCCGACAGATCATAGTCA<br/> TTCTTCTCTACAACACCACCACATCGAGCATGCCGTCGATCAGCCACAAACCCATCACAGCC<br/> AAGCTGGTGGCTGCCCCGGATGCCACCAAGCTCGAGCTCTCGTCTACCTGTACCAGCAGCT<br/> CTTTTCCGACAAGCCAGCCGAGCCATATGTTGCGTTTGAAGCTCCTGGAATCAAGTGGGCTC<br/> TGTATCCTGCTTCTGAGGACCGATCTCTGCCGAGTACACTTGCAAGGCCGACATTCGCCAC<br/> GTGGCAGGCAGTCTCAAAAAGTTCATGCCCGTGGTGTCTAAAACGGGTCAACCTGTACGGA<br/> TTGAGCATGCCATCGTACCGTGCCTGCCAGCCAGTACGAAAACGCTTAACACACCCGAAACA<br/> AGTGCTCAAGGCTCTCGAGCCGCAACTCGAC</p>                                                                                                                                                                                                                                                                                                                                                                                                                                                                                                                                                                                                                                                                                                                                                                                                                                                    |
| <p>IntE up homology<br/>arm</p> | <p>CACCTGTGGCTAATTTGGGAGATGAGCCTTAGTGGTAGCAGGAGTTGGCGAGCGAGCTACT<br/> TATAGTGGCTTGCTAGAATACGGTCCAAGTCCGGTCCGAACATGAACGAGGGGCCAGAAG<br/> AGAACAAGAAGAGATGAAGAGCATTAGACAAATGTCAGGGGAGCTTTCACTTCAAGTCAAA<br/> GCCAAAAGAATGCGGGCTAGGGCTCGGGGATCTCACACCAACACCCAGTCTTGGCAGAC<br/> GTTTGTGGGGCTAGAAACGGCCCGTATCGTGGGTGTCGTATCGGTGACACAAGTCTTCGTT<br/> CCGTGGGGGAGGGGAGCCACGAGAAAGCGGAATACGAGGACGATACGTCTGAGAATGGCG<br/> ACGGATTGACGGATTGACGGATTGACGGTTGTTGGCATAATGTGACGTTGGCGACATTTTGA<br/> CAGCTGACGGCTGGCATTGACAGGACAATGATGAAGCTGCAATGACACAACAATGAGCGAG<br/> GCTGGGGTTTACAGACGCAACAATAGAAAGACTTATCTGTATGCAAGTCCAGGTCAGATT<br/> TGTCATAGACAAGGCTCCAACACTGACGACAAACTGACGGACATTCAAGCGCGTCTCGT<br/> ACTTCACTCCTGAAAACAGAGACTGACAGGCTTGATACACGGCATCAGAGAGCCGCATTG<br/> CTCTTAAGTGAAGTCTGGAGATTCTTCACTTCTCCAGCCACACCAACAACCGTTTCTTT<br/> TTGCCACGCGAAAGCGGAGTGGACGGACCGAAAGATGATAGACAAGCTAGCGAGGAAA<br/> AGCAAAGGCAGCCGAGGACTAGACTAGATCGGGGCGGGCGAAAATTGTTTACAACAACCTCT<br/> GTCCTTGCGCGTTCAGGTTTGGACTAAATCAACCTACAAGAGTGTCTACTGGACCGTATAT<br/> ATGAAATGACATCATCGTGTGACGCTGTCAAACGTCATAAAAGCGGTTGACGTCTTCGGTAG<br/> CCGTTCCACAGACTTCTAGACGGGAAAAAAGGGGGTTAGCCGCGGTGGTATGGTGCCAA<br/> ATCGCTTGTCACTTTGACACAATGAAGATATTCGATTTCAGTCGATACCATGGCCGTCACCTT<br/> TCTTGCCGACCTCTCAACTTTGTATCTATGTCTCAGGACGGAGTGTGTTGCCATCCAGCCCC<br/> TACCAGTTCCGTGGTATGTTGAAAGGGCTATTTTTATCCAGATCAGAGGGTCACTGGAGCT<br/> TGAATAGGATCCACAAGAAGTTCAAAGGACTTTACTGGTGTCTTTTGTCCGAGAACTTCA<br/> ACAACCTCCGTCTGGTGTCTCCAAGATAGATTCTGGTGCTCTCCACGCCTATACATCTCCAAG<br/> TACTGTACACCACAAAACCTTCCGGGTGGTTGCTTACAGTTTCAATAGCGGACCGCTTGAT<br/> TTCGGCAAATCTACACCTGCCAGCTACGCATATTGCAGGAAGCAGCATCATGGAATGGACT<br/> GTATAGCCATAAGACAAGAATGCTCTGGAGAAATCGTCCGATTTGCTGCACTAAGAC</p> |

|                                         |                                                                                                                                                                                                                                                                                                                                                                                                                                                                                                                                                                                                                                                                                                                                                                                                                                                                                                                                                                                                                                                                                                                                                                                                                                                                                                                                                                                                                                                                                                                                                                                                                                                                                                          |
|-----------------------------------------|----------------------------------------------------------------------------------------------------------------------------------------------------------------------------------------------------------------------------------------------------------------------------------------------------------------------------------------------------------------------------------------------------------------------------------------------------------------------------------------------------------------------------------------------------------------------------------------------------------------------------------------------------------------------------------------------------------------------------------------------------------------------------------------------------------------------------------------------------------------------------------------------------------------------------------------------------------------------------------------------------------------------------------------------------------------------------------------------------------------------------------------------------------------------------------------------------------------------------------------------------------------------------------------------------------------------------------------------------------------------------------------------------------------------------------------------------------------------------------------------------------------------------------------------------------------------------------------------------------------------------------------------------------------------------------------------------------|
| <p>IntE<br/>down<br/>homology arm</p>   | <p>GTGTGGATTGCGATATTGAAGTGTGACTCGAAGAGACAGCTGCCTGTCAAGTTGATTGTTA<br/>GCTCCTTGGCATAACAGATGCAAGAAATGAGAGTGGCCATACGGCGGCAGTTAGCATAAGAT<br/>ACTACTTGTAGGAGAGAGCGCTACCACCAGCTAAATTTAGGACCTGGCTGTCTATTTACA<br/>TTTTTGACCCTGTTGGCTGCCTAGCTATGCGGCCAGTCAGCCCCTGGACATGTGTTTGGC<br/>ATGTGTTTGGTGCAGGGAGAACC CGATGGTGACCGTCCAAGCAATTACCCGTTTGGACCA<br/>GAAGAGTAAAGAGCGACATTTGCAAAAAGAAACCGCTGAAAAAGCAACTCCAGCGATGAG<br/>GAACTGAGAGTCTGAAGTCTCTGGACGAGGAGTGGAGGGGGGATGCCTTCTGTGGGTGCCG<br/>TACGTGTCTACCGAGAAGTTAAACACCTCCTGTGTGATAGTCTACAAACCTGGCGTATTT<br/>CAGTTCGAAATGTCTCGGGAACAGTTGTGTGATATTACACCTAGACAATAAATGTGTG<br/>GGGGTTGTATGAGCGGAGCATTCTTCTGGAACATGTCGATCCACTAGGCACGATATACA<br/>AGTGGAATCACAGTAACCCCGCCACTCCCTCCACTCTCCAATGTAACATATGTCCGATAC<br/>CAGACACTATCGACACTCACTCGTATCGCTCTTGCACTTTCCAAACGTTACGTCTCCCTGATC<br/>ATGCTCTGGCGATCAACCTTCTCCACCCGGGAGCCATGTCACGAGAACCAGTGCATAGCCAT<br/>GGAGAAGTGACCAACTCATATGACAATACCTGTAAGCGCGACAGCGGCTAGACTTGGCCGT<br/>TTACTCTCTGTTTTAGCACCTCCAAACGCAGCTCCGAGACGTGGAATCTAGTGGGCCAAA<br/>AACAAGTCTCTGTTAGTGGGTGGTGCCTGCTGCTGCCCCGAGACCTCCTCACCTTGTCTGT<br/>ACACAGCAATTCACACCGCTCTCCTCCCGTCAGATTAGGTTGACAACTTTCATCTGCTTGTA<br/>AAATATTCAATGATCGATCTCAGCCGAACCGTGACGGAACACTACATGGTGAAATGGCTGA<br/>TCAAAAAGCGAATAAAATCCATCAAACCATCCACCACCGCCc<sub>6</sub>GTGTAGACAACACGTGG<br/>ATGATTCGACGCAACCTGTCTCTTGTGGTCCCGAGTCTGTCTCAATCTTTTTACCTCTCG<br/>GATCCCGCGCAAGACTATGACGTAGGGCGGCTCTTGTGTACACGGTc<sub>6</sub>GGCCCCCTCCTCCT<br/>CCTGCGTCCATGCAGCTTCTAAAATGGACATGCTCACTTGTCTGCATTTGGAGGTAAGTA<br/>TTTATGCACAAGGGGGGAGTGTGATATATCATAAAGTCTAATCTTATTTTACGCGTCA<br/>TGTGCGTCACAACAATCACCATTGTGCAAAATTTAAGAAATCAGACCCTTTCATCTGGAAAA<br/>ATGCAAAAGCGAAAAACCAGAGATAGAGAAAGGGTGA</p> |
| <p>IntF<br/>up<br/>homology<br/>arm</p> | <p>AGTGGTAATTCAGCAAGACCCTGGGATGTAATCTGAAACAGCTTATAAAATGCATTGTCATC<br/>CATAATGAGAAAAAGAGGTAATAAATGAGGGCTGTCCGCAATTTGCCCGAGACCCGCCGA<br/>GAGTGTAAGCTACTGGCAGATAGACATATCGGATTACTTATTAGCTATAAGACTTGTGTTA<br/>GAGGTTGTGGGATCGGCATTCAGGTGATACAGTACGAAACGAGAGTTTCTCCACATGAAA<br/>AAATAATCGAATAATAGTACAGCATGCATTTCATCGCTACAGATTCGACATGGATCTCCTCGT<br/>CTTATCTACCATGATGCAGATTGACAGCTGAAACACGCACATTATCGGATATTGGAAGCCAC<br/>TAGCGTCGCTGATGGTGCGAAGTAGTGCGAATGTAGCGCAAGTGTCTGCTCGTTTATATTC<br/>TGTGCGGTGAAAACCTTCTAAACGGCATAATTGGCAGATACTTGGTTCAACGTCTACAAGTATT<br/>ACCATCACTCATTAGTTCATGGGTACGTGTTTTTATTTTTATTTTTACATGCCCCCATCA<br/>CATGCGAGCACTTCCAACAACTCCAAGAGTGTGATTCTGTGCGCTCTTTTTCTCCACTTT<br/>TTCCCACTCATGATCAACACAGTTAGTAGCTGTCCGTAGCCTATCGCTGGCCTATGCACCC<br/>TCTTCATCCGCATCAGGCAACAGTTGGTCTAGGCTTGGTAAAAAAGGAAAGCCGTACATG<br/>CCCGGAATTCTGATAGCAACCTTCGTCCGACGAACACAACAATCAAATTAATAAAAAAAT<br/>GCGAGGACAATGCAGGGTTGGTATGAAAGAGCCCGTGCAGTTTTGTAGTCGGAGGTGCAG<br/>CTCTTGAAGAAGGCAAAAAGAGCCAAAGCTGGTAAAGTACATAAAAATATGATGTGTGCCG<br/>TTTTGTGCATGTCACGAAAACGACTGTACCAGGACCGGATGTAGGCACAGTGGGGGGTGT<br/>AAGTGAGCCGGCAGCCGAGGTTCTTTTTGAGACTGTCTGAAAGGATCAGATATGAGCTCTC</p>                                                                                                                                                                                                                                                                                                                                                                                                                                                                                                                                      |

|                               |                                                                                                                                                                                                                                                                                                                                                                                                                                                                                                                                                                                                                                                                                                                                                                                                                                                                                                                                                                                                                                                                                                                                                                                                                                                                                                                                                                                                                                                                                                                                                                                                                                                                                                                                                                                                                                                                                                                                                                                                                                                                                   |
|-------------------------------|-----------------------------------------------------------------------------------------------------------------------------------------------------------------------------------------------------------------------------------------------------------------------------------------------------------------------------------------------------------------------------------------------------------------------------------------------------------------------------------------------------------------------------------------------------------------------------------------------------------------------------------------------------------------------------------------------------------------------------------------------------------------------------------------------------------------------------------------------------------------------------------------------------------------------------------------------------------------------------------------------------------------------------------------------------------------------------------------------------------------------------------------------------------------------------------------------------------------------------------------------------------------------------------------------------------------------------------------------------------------------------------------------------------------------------------------------------------------------------------------------------------------------------------------------------------------------------------------------------------------------------------------------------------------------------------------------------------------------------------------------------------------------------------------------------------------------------------------------------------------------------------------------------------------------------------------------------------------------------------------------------------------------------------------------------------------------------------|
|                               | <p>ACATTTCCCGGACCCTGTACAAGCACGTTACAGGTGGTTTTGCGGATATCCACTACACTTTC<br/> GTTCTCTACCAAGTCTATTTTGTGGGTGTGTCTAGTTATCGCTCCGACAAGGTTTACAGCGG<br/> AATACGACGACTCTTGCTTCTTGTCTGCAGAATAACAGAAAAAGGGGAAATACGAAAAC<br/> TGACGGACAAGGGATGAGAAACAAGGGCGAGAGTGTGACACACATAGGAGGTGATTTGTC<br/> AACTATGGACAATGACCGTGCCACACAAAATGTGACACAATGACAGGATGCTTGTGAAAGG<br/> GAATGGTTAGTGGGAATGTGATAACTGGAGTGAGTCGTGTGAGTGGGATGGAGTAGCGAGA<br/> ATGTGAGGTATTACACAAGCAGAGACGGTACCGTTGTTGAGCATTGCACACGGCACAGTTA<br/> CAAGTAACTCTCGGGTCACGGTAAGAAGTGCTTTTCAGATTGTTCCCTTTCCGTCGATCCTA<br/> AAGATACAAATGAGCCACTTTTACGATGATCATTATACGGTATGTATTTTGTAGATGTAGCT<br/> TGGAGGGC</p>                                                                                                                                                                                                                                                                                                                                                                                                                                                                                                                                                                                                                                                                                                                                                                                                                                                                                                                                                                                                                                                                                                                                                                                                                                                                                                                                                                                                                                       |
| <p>IntF<br/> homology arm</p> | <p>GCACAAGCCTCTCTATAATCTTTTCTTCATCTTCACATGCTCAAAGCGTCTGTTCTGTTGTA<br/> TTATGTTGAGACCTCTCGTGACAAACAAGCGACGAGGGGAAACATGTGCAGAGAGCCGGC<br/> AAGAAGGAACAGATATACACGAGACAGGGCGGAGATACCGGTTACGGAATAATAAATGAA<br/> GGCTGCAACCGCTTGGGGACACCCCCCATAGTCCTTTTAAAGCAATGGTGTATATTTCTTC<br/> TTGTAGCCAGCTCTTTAGCTCATCCAATTGCCCTCGACATCGCGCTCTCTGTTTCGCCCT<br/> TTTGTCTTGACAGAATAACAATTTTTTTGTCTCTCGACTGCCTACAGTAGGGTTTCAACCAGCC<br/> TTAGGTTAGAGTTGAGTGCAGGGTATGGCTGTGCATACACAAAAAGCCAGAAGTCCAGAT<br/> GGTGTGCAACTCCAGGTTTCCATGGGCTAATCTCCTTCCTGCGACACAAGCAAGCTGTCTCA<br/> GAGTCGGAATCGGGTGAACCTACTTGTAGGGTAGACATCGACTTTCGGCTTTACCGAGCTC<br/> CAGAGCGGGTCGATCGTGTTCAGAGACTGAAAAAAGGAGAAAAAAAAGACTTCCAAGG<br/> GGCCTATCCGGGAATCCGAGAGACATTGGATATGGACTTGCAACAACATCTGGGCTAAT<br/> AATGGGCCCTCAGATTTAGCGGATATTTTCGTAGCTCATTGGAACGCTACTGATAACCAAT<br/> TTCTACTGTAAAGCTGCTCTTCCTTGAAGATGTAGTCGCTTTTCGCTTGGAGGGAGAGGTAC<br/> CATGTTGGTAGTATATACACCGGCATGTAAGTGAAGCCGATGAGCCTGTCTGCTGCTCTG<br/> TCTGCACTCCAGGTTTCGTTATTGTCACTCTTCTGGCGATGATGCAACTCGTATTGAAGCCCTC<br/> AGACGCGTTCACATCAGAGTTTTGTATCACCATTATTATGCGGAGTCTCCGATTTAACGC<br/> AAATAGACTAAGTTGAGTGTGATATCCACAACGATCGACACTACCCCTCATACCAATGGC<br/> TTTTGTTTCGTGTTGTTGGATGAGGACCTGAAAGAATTCAGATGTAGATTTCCGAGAGCT<br/> GAACATACGCATCAGCTATTGTCTCGTACCAGGCACGTAAGCGAAAAATAAATGGCCAGCA<br/> TGTGCATTGCAAAAATAAGTTCATGACAGCACTAGCACTATGGGCCAGACTAGACGCTAAG<br/> TTATCATGTTCTGTGTGCTCCACGATAGGCACGGATCAGTGCATGGAGGTAGATGGATAGC<br/> TGATCCTGGCCCAATTTCCCGTCTTTGAGCTTCTGGACTACGCTGAATTGGCACACTTTGC<br/> CTCATCGTCACCACAGCTTACAGCTATACAGCGAGTGTACCAAAATAGTATATTATAAATG<br/> CACACTACGCAAAACCAAAACCTTAACTTGATTAGATAGACAGAACACCTAAAGACTGAAA<br/> ACACACACTGTGTGATAAGACCACAAAACCACGCCCTCCAATATTTAAGGAGTCACCTGGC<br/> ACCACACAACTCTTCTTCTCCTCAAAAACATCCCTTTCTTGGGATATCTAGAGTGCAGTGCTT<br/> AGCTCTAAACACTTGGTGAGTACTCGTACCTTCCGACACAAACACACGACAAAACACAAAC<br/> AGAATATGGGCCTATAACCCCTTGTGGTTTTCCGAGGGTGGTTGTCTTAGTCGTGAGTGA<br/> CGACAACTCTGTTGGCAGGGGTTTTATTTTTTCGTTAAGTTCATACACTACCCGAACCTGGC<br/> GGTGGTTGACTGATACAAAAATGGTCCCTTCTGGTCAACAGCCGTTGTCGTCT</p> |

|                               |                                                                                                                                                                                                                                                                                                                                                                                                                                                                                                                                                                                                                                                                                                                                                                                                                                                                                                                                                                                                                                                                                                                                                                                                                                                                                                                                                                                                                                                                                                                                                                                                                                                                                                                     |
|-------------------------------|---------------------------------------------------------------------------------------------------------------------------------------------------------------------------------------------------------------------------------------------------------------------------------------------------------------------------------------------------------------------------------------------------------------------------------------------------------------------------------------------------------------------------------------------------------------------------------------------------------------------------------------------------------------------------------------------------------------------------------------------------------------------------------------------------------------------------------------------------------------------------------------------------------------------------------------------------------------------------------------------------------------------------------------------------------------------------------------------------------------------------------------------------------------------------------------------------------------------------------------------------------------------------------------------------------------------------------------------------------------------------------------------------------------------------------------------------------------------------------------------------------------------------------------------------------------------------------------------------------------------------------------------------------------------------------------------------------------------|
| <p>SCP2 up homology arm</p>   | <p>CCGACAGTCGTCTGCACCCCGCAAGTCTCGGTTCTGACCAGCACCAATGTTAGGCAGAAGCTA<br/> TACACAAGAGGGGGGACGATCACTTCGGCGTTAGGCAACTGAAGGCTATTTTCGGCTGGTA<br/> CTGTAGGGGACAGAGGAAACGCAAGTGATTAGTAAATCGGATAATAGGCTGTAGTTTAC<br/> CGAAATGGTGGGGAGGGTTCCGTGGATATCTTGAAGTTATGGAGGCTGATCGTTATTTGT<br/> GGGGATGGATATCATTGTATGGACATACTGTAGCTACTGTATAAAACAACGGATCTTACACCT<br/> GCCTCTGTATGCCATTGCTTGTATCATCTATCGTGTACTGTACATATAACAATAGATATAGG<br/> GAAGAAAAGCCGGAAGTAGAGACCATAGTCTGGCAGAAGTAACGGCCTCGGGTCGAGAGA<br/> ACTATAACAAAGTCCAACGGCGGGTCTTAGAATAGCCCAAGGATCACACAGTTCCGCAAT<br/> CCAGTTTCACATGTTCCGTTGCATGGACTTTTGCATGTCTACTGTTGCTACGATTCCCCATT<br/> GCAACCACAGTTTGGGGTTACCCCGCATTATATTAGCATGATTACGAAAAGAGATAAGTATCA<br/> TATGGAACATGTGAAGGGTAGTATGCAGGTCCGGCGGAGAAAGAGAATGACGTTTTCATTA<br/> AGCGATTTCGCTTGGCGGCTTGTGGGGGATGTGACGATACTTACGGTAAAGACCCTGTGTGA<br/> GAGCTGGTACTCGCTCGTTACTTCGCTGATCTGTTGGGCCGTCAATCGAATCTCGTGGAAC<br/> TGCATTCTTCTTAAGTGTGTCTATAACAAGACACCTAATGAAACATAACAAGCTACCGAAATCA<br/> TTTTACTCGTACTGACCGGTACGGTACTTGCACAAGTAGTGAAGTCTCCGAAAATAGCCAGC<br/> CTCATGCATCATCGCTTACCCCTTCTGTGACCTCAAAAGCATTCCAACGGTAAAAAATTA<br/> TAACGCCCAACTGGATGGTGTGACGGCGTTGACCACCAATGTGTGGGGCTGGCGGTA<br/> GGACCGAGCTTATTCGTCCAATAAGCTCTTTGGATTGATTCTTTGGGGTGTGTGGTAAAA<br/> TTCACATGGGGAAGAACACGGTGGCAGTTTGAGGCAGAGGCCAGCGTGTAGTTCCTAGGG<br/> CATGAATATAACCGAATCATGGCGAGAATTGAGCTGAATGCGCAAAAAGCTACAGGATCA<br/> ACCGCGTTAGAAATGCCGCAAATGTCCACTAATCCCGGACTGTTCCAATGATTCTGTGG<br/> GGATAAATCTCAAAGTGGGTTAGGCTTTGTACAGTTTCTTTGTGTGCTGTCGGTTCGTCGGG<br/> GCAATGTGCCACGCTTGGCTGTCTCCCTACACCTCGGTA AAAACTATCACATGCTGCCCT<br/> CTCGAGCAAGCATTAAATGCATATAGTCAATCTAACGACATATATAGGTAGGGTGCATCC<br/> TCCGGTTAGCTCCCCAGAATATCTTATTATTACACAAA</p> |
| <p>SCP2 down homology arm</p> | <p>CAAGTCCCCAAGGGTGTGCTGACATCCAGCTCACTCTCTCTGACGACCCTCCAGCAGC<br/> TCGTTGAGGGTAAGGCTAACGCCAGCGACTTTCATGACCGCAAGCTCAAGGTTAAGGG<br/> CAACGTCATGAAGGCTGCCGCCATTGAGGGTATCCTCAAGAAGCTCAGAACAACCTCTAA<br/> GCGCATCATTTATTGATTAATTGATGATTTACTATATTGATTTCGCAACTGTAGTGTGATTGT<br/> ATGTGATCTGGCTCGTAGGCTTACAGTAAATACTAGACGGGTATCGTACGTAGTTGTATCATA<br/> CATCGAGCCTGTGGTTACTTGTACAATAATTCGTAATGTAGAGATACCCCTTGATCCATTGC<br/> CTGTTTCTAACATAACAATGATCTCCACGCAATAATCCACTCTTGACTAAAAGTTGCTACTCT<br/> TGCACGGTTACCTCGGCATAGTCACGCCCTCTTGTCTCGTCTCGAACGCACAAAAGTCAATT<br/> GACAACGCCACTCACTCGAGTGTGCCCCAACAGGGCACCATATCGACTAATTTGAGGCCAA<br/> CTAGGGTGATTTGGATGGAATTTGATCGGAAAAAATAGCTGCAGAAATCCTGGAGAGAA<br/> AAATTGACCGCATCCACATGGTTTGACCAAAAAATCGTCTCCATCTCTGTGCTCAACTCTCC<br/> TGACGAGATATGCGCGCGCACCCACATGATGTGATTGATCTCAACAACTTCAACCCAGAC<br/> CCTTATCTTTCCGAAAACCTACTGTATAAGTGGTCGTGCGAACAGAAAGTGTGCGCACTTT<br/> AGGTTCTAGATCCGATTGTCTCGTTCTGATAATGAGCCAGCCCCGCGAGGCAATGTTTTT<br/> TACAATTGAAAACCTCGTTAACCACTCACATTACCGTTTTTGGCCCATATTTACCCTCTGGTA<br/> CACTCCCTCTTGATACACACACTGCAGTGAAGTGCCTCCGTTAGCACCCTGTGATT<br/> GGTTCAGGGCACGAGTTGGTGGTTAAGGCGCAACTACATCAATATGAAAACAGGAGACG</p>                                                                                                                                                                                                                                                                                                                                                                                                                                                                                                                                       |

|                                                     |                                                                                                                                                                                                                                                                                                                                                                                                                                                                                                                                                                                                                                                                                                                                                                                                                                                                                                                                                                                                                                                                                                                                                                                                                                                                                                                                                                                                                                                                                                                                                                                                                                                                                                                                                                                                                                                                                                                                                                                                                                                                                                                                                                                                                                                                                                                                                            |
|-----------------------------------------------------|------------------------------------------------------------------------------------------------------------------------------------------------------------------------------------------------------------------------------------------------------------------------------------------------------------------------------------------------------------------------------------------------------------------------------------------------------------------------------------------------------------------------------------------------------------------------------------------------------------------------------------------------------------------------------------------------------------------------------------------------------------------------------------------------------------------------------------------------------------------------------------------------------------------------------------------------------------------------------------------------------------------------------------------------------------------------------------------------------------------------------------------------------------------------------------------------------------------------------------------------------------------------------------------------------------------------------------------------------------------------------------------------------------------------------------------------------------------------------------------------------------------------------------------------------------------------------------------------------------------------------------------------------------------------------------------------------------------------------------------------------------------------------------------------------------------------------------------------------------------------------------------------------------------------------------------------------------------------------------------------------------------------------------------------------------------------------------------------------------------------------------------------------------------------------------------------------------------------------------------------------------------------------------------------------------------------------------------------------------|
|                                                     | <p>CTGAAAAGGGGTAATATCGGACTGCTGCTATGTTGTATGTAAGTGCATGACGAATTGGTGTTA<br/> TTCAAGACCGTGGCACAGGTTGCTGCGGTACGAGACCTGGTAGCTTCTCTAAACGGCATGTC<br/> TAGGTGGACGAGTATGGAGAAGTTAGGTACAGTACGTACGTATACGAGTACGAGTACGAGT<br/> ACGTAGTACGATACAGGGTACGTAGTACGATACAGGGTACGTAGTACGATACAGGGTACGT<br/> AGTACGATACAGGGTACGTAGTACGATACAGGGTACTTGTACGAAGACAACAGTAGAGTGC<br/> AAATATCAACCAACATGGCCAGAGCGACCAGTTCAGCTTTCAGGGGGCCCTCTAGCACTTG<br/> TCACCATATGTAGCCGTGATAATTATGCAGTGATGTGATAACTACTGTACAAGTAGAAGTAA<br/> TCCGGTGGTGCTGGTACCTTGAATTGAGTCTCACTATCGGTT</p>                                                                                                                                                                                                                                                                                                                                                                                                                                                                                                                                                                                                                                                                                                                                                                                                                                                                                                                                                                                                                                                                                                                                                                                                                                                                                                                                                                                                                                                                                                                                                                                                                                                                                                                                                                                                                 |
| <p>A08 up homology<br/> arm<br/> (YALI0A08382g)</p> | <p>GAGCAGGACCGCTCCAGAAGCTTCCCACCTTTGAGGGCTTCAAGTCCACCTCCAATGTCTA<br/> TGAGAGCTTCTCTACGGATCCGACTGGAGTATGAGAGACGACTTTTTCTCCTGGTGGAGAA<br/> ACTCCAACACCTGGGGCGACTGGTGGTACGCTCGAAAGCCCGATACCCAGCCCGGAGCCTG<br/> GCCCCAGCCCAAGCCCCGGCCTGAGCAACCCGTCAGCCTATTGGAGATAACCCGACTTCTC<br/> CTGCTCCTGCTCCTGCTCCTGCTCCTGCTCCTGCCACCGAGGAGCCAGGCCCGAGACACCT<br/> GCAGCTCCCTTCTCCCGCCACCTTTCAGGAAGTTCCACCAAGAACTGGGGTCTTTTTCGA<br/> GTCTCCACAAGCAAAACTCCCGTGACCAGACCAGTACGCCATGAACAAGAACACCCTGA<br/> ACCCACTGTGCCTACATTGTTGACTCTGGTATCCGAACCTCCACCGAATGTTTCGAGGGC<br/> CGAGCCTCCTGGGGAGCCAACCTTGTGACAACCTCAATGTGGACTTTGAGGGTACATGGTAC<br/> CCACGTGGCAGGCACCGTCGGAGGAGCCGGCTTCGGTGTATCTCCCTCCACCAAGCTGATTG<br/> CCGTCAAGGTGTTCTCTGGAAAGTTTGGAAAGCTCCTCCAGATCATGCAGGGCGTGTCTGG<br/> GCCATTGATGACTACGTCAAGAAACAAGGCCAAGTATCCTCGAGCTGTGATCAACTTTCTGG<br/> TGGAGGAGACACCTCCGAGGCCGAGGACGCGCTTTTCGAAAGGCTGTTGAGATGGGCATG<br/> GTTGTGGCCGTTGCTGCTGGTAACGAGAAGTCCGACGCTTGTACGTTCCCTGCCCGAGC<br/> CGGTGCTGGCACCGCCGATTATCACTGTGCGAGCCTCCTCCGCCGACGACTCTCTCGCCT<br/> TCTGGAACGCCCAAACCAACAAGGCCTCCAATTGGGGCAGATGCATCGATGTCATTGCCCC<br/> CGGTACCGAGATTCTTTCTGCCGACTACCAAACCGACAACGGTATCCTTTCCAACCTCTGGAA<br/> CGTCCATGGCCACTCCCCACGTGGCTGGACTGGCCGCCAGCTGATGGTACTCTCGTCCGAG<br/> CTGCTTACTCCCGCCAGGTGGAGGAGCAGATCATCAACCAGAACAACGGTAAGATCACAG<br/> GAAGACTCAACGGTACCCCCAACAGCTCGCTACAACGGCTCCGGTCTGTTAGGTTGGCTA<br/> GTTGGATCACTGTGCGACGAGTTCAATCAATCAATAATAATTCTTAGTTTTGTACTGTAGC<br/> GTAGCATCAACAGGTGACAAGAATTGCAAGTGTGTAGAGTCGGGTATACGAAACTGTTCT<br/> TGTCAAAAAATGTATGACTAACCTAGTACTTTCCCTTACAATACAGTATGAAATTAACAG<br/> CTTTAAACCACCATTTCCAGCTTCAGATACGATATTTAGTCAGTCTGATAACGTTACCGACA<br/> ACAGAAATGATCACCTGCGAAATACAATATCACAACATTCTGCGGAGCCGTTTTTACAAC<br/> CCAAAAGATAACAATTTATCTGCATAAAACCCGCATACACGTGCATAATACTTGCATAACG<br/> ATAGCATATAAACTGCACGATTGCTGCACCTGACTTTATATCAAACCTCAATATCAGCACCAC<br/> CCGATTCTCTGATTATTCATCAACTATAGGAGAGAATGAGTTGGTGATAAGACATCGGTAC<br/> CAATAAAAAATCACGTGACTATTCCACAGGCCTTCTGTTATATCATCAGATGCCTTTGAACAT<br/> TCTCTTGTGCAACTGAGTCCAATTTCAACAACCTTTCCACAGTGCCCGTTAGGCCAATTA<br/> GGGTTTGGCAAAAAATCGGCAATATAAGACAGCCAGATGTGTTTCTACGATGGACAACCCG<br/> CAGCACTTACGATGAGCGAGAGTAGACACAGTAGCAAGCGTAAAAGGCGGCCGAGGCCA<br/> CCGAGAGAACAGCGTAGCAGGGCGCGTAGTACCACAGGGGACGCAGAACCAAACCAATG<br/> ACGAAGAAGAACCAAGGAGACGTTTTCAAAGCAATGCAATGAAGAGGGCAATGGAA</p> |

|                                                       |                                                                                                                                                                                                                                                                                                                                                                                                                                                                                                                                                                                                                                                                                                                                                                                                                                                                                                                                                                                                                                                                                                                                                                                                                                                                                                                                                                                                                                                                                                                                                                                                                                                                                                                                                                                                                                                                                                                                                                                                                                                                                                                                                                                                                                                                               |
|-------------------------------------------------------|-------------------------------------------------------------------------------------------------------------------------------------------------------------------------------------------------------------------------------------------------------------------------------------------------------------------------------------------------------------------------------------------------------------------------------------------------------------------------------------------------------------------------------------------------------------------------------------------------------------------------------------------------------------------------------------------------------------------------------------------------------------------------------------------------------------------------------------------------------------------------------------------------------------------------------------------------------------------------------------------------------------------------------------------------------------------------------------------------------------------------------------------------------------------------------------------------------------------------------------------------------------------------------------------------------------------------------------------------------------------------------------------------------------------------------------------------------------------------------------------------------------------------------------------------------------------------------------------------------------------------------------------------------------------------------------------------------------------------------------------------------------------------------------------------------------------------------------------------------------------------------------------------------------------------------------------------------------------------------------------------------------------------------------------------------------------------------------------------------------------------------------------------------------------------------------------------------------------------------------------------------------------------------|
|                                                       | <p>GGATGGAGATTAGAGAACTGGAGACTGGAGTGGCGTTTTCCCGATGAACGAACAAACACGC<br/> GAAGCTATGTGGACCAACATACAACACGGACTGAACCAGGTTTTTTATGATTTTTTACTG<br/> GAAATAGGTACGTGCCAAGTTGGACCATGACACTAAACGTGTTAATTAGTAATATTCGTGT<br/> AAGCGTACATTCATTTCAAAGGTTATCTTTTCATGGCAAAGTTATAATTAATGAATGTATA<br/> TGCAGAAAAAAAAAAAAAGACAGCAAATAAAATTTATATAAAAGCCCATCGCTGCCTTGT<br/> GGAGCCTCGTTTTTTCCCAACAACAAGCTTAGCAGTAATTGGGTCCTCTATTCTCAATTGCA<br/> CGTTCCTCCCTCTCCTTACAATCACTACTCTCCCGACTATCCAACAACGCAC</p>                                                                                                                                                                                                                                                                                                                                                                                                                                                                                                                                                                                                                                                                                                                                                                                                                                                                                                                                                                                                                                                                                                                                                                                                                                                                                                                                                                                                                                                                                                                                                                                                                                                                                                                                                                                                  |
| <p>A08 down<br/> homology arm<br/> (YALI0A08382g)</p> | <p>GGAGCCGAGTACGGCATTGATTACAGACGGCTTCTTGCTCTCGAGACCCAGCCTAAGCGAGT<br/> GGCGGTGGTTGGAGGAGGCTACATTGACGTGGAGCTGGCCGGTGTCTTCCACGGACTCAAC<br/> TCCGAAACCACCCTTTCTGTGCGAGGCCAGACGGTGTCCGAGCGTTCGACATCATGATCCA<br/> GGACACCATCACCGACTACTAACAAGAAGGGCATCAACGTGCTCAAGGGCTCTGGCGTCAA<br/> GAAAATTGTCAAGAAGGATAATGGCGAGCTCACCTACGGGCAGGATGGCGCCGAGAATGAT<br/> ATCACTCTCGATTGCTCATTGGATATTGGACGAGAGCCTCTCAAGGACACCCTCAACCTG<br/> AGCGAGTTGGCATCAAGACCAACAAGCGGGCTACATTGAGGTCTACGAGTGCCAGCAATC<br/> GTCTTCGACAACATTTATTCGCTTGGAGACGTTTGCTGCAAGGTCGAGCTGACCCACAGC<br/> TATTGCTACTGGACGAAATCTGTCCAACCGGCTGTTGGTCCCGCTGAGTTCAAGGATCAGA<br/> AGCAGGACTACACCGATGTTCTTCGGCCGATTTTCCACCCCGAGGTTGGCTCCATCGGC<br/> ATCACGGAGGCTGCCCAAGGAGCAGTATGGTGAGGACAACGTCAAGATCTACACCTCTA<br/> AGTTTGTGCGCATGTACTACGCCATGTTGCAGGAGAAAAGCCCTACCGCTACAAGCTGGTG<br/> TGTGTCGAAAGGACGAGAAGGTTGTTGGTCTGCACATTGTTGGCACCGACTCTTCCGAGAT<br/> TCTGCAGGGTTTTGGCGTGGCCGTTGCAATGGGAGCTACCAAGCCGATTCGACAATGTTG<br/> TGGCTCTTGTCCACTTCTGCCGAGGAGCTGGTGACAATGGGATATAACGGGAGCGCGGGC<br/> AGAGATTTCTGTTTGGGCTATCGATATTTAATCAACTAGACTCCACTGTTGCTGTACAG<br/> GGTCAGAGAAGATACTAGAGTACGGAAGTGCCTTCCGTTGGCTGTTTTAATCGCCAAACGG<br/> TTTGAATATGGCATAAACTAGTCTTGTCTGCTCGGTTCTTTTCCATGGGCTCTTTTCCCA<br/> CTTGTGAATGTTGATGGCGAAATGAAGACGGGCTAGAAAAGTGGAGAGACAAGAGGAAGTT<br/> GCAGAAAAGTTCGATCAGCGGGTCTTGGGTTGAGGGAAATATCCAAGATACGGTCTGGGT<br/> CGTGGGAACCTACATATAAGAGGGCTGGAGTCTGGATAGAACAAGTCGACACATTTCAAC<br/> CGGCCATCATCGTTCCGATGAACCTCAAACATCTCCAGTTTTCTACCCGAGGAGGCGTT<br/> AGAGGTGAAGGACAACCCGAGTTTGTCTCTGTCTGTAAGGAGTCTCAAGAGGAAAA<br/> AGTACTGCCGAAGCGACCCAAGAAGAAGTGTCTTAGATGGAGCACTCCGTCGCTGGAG<br/> TAGAAGTAACTGTAGCAATAACTGTTGAAGTGACAGTAACTGATCAGACATTGATCATACG<br/> TGCATCAGAACTACCCTCTGTTAACTGAATAGCACAAGATAACGTCATATCGAGGGGATGA<br/> GTTTTCTGTGATTGAAACCAGTGTGTCGGTCTATACATCTTGAAAACCTTCCAATAGGTGA<br/> GGGCTACAAGTATGTACATACTGTCTCTGAACCCTCAGTTGAACCGTGAGTACGCTCTTA<br/> AACGCCCAGGTGAAACGAAAAGAAGGAAGAGTTAGGTCCTTTGGGATCCCGGCTCATATTC<br/> TTGCTCCTAATGGCTGTCAGGTGAGCAATTCCAAACTTTCCATGTCCATATCGCAGCCCTAT<br/> GGTGTTCAGCCTCAACATTGCGTCGTGCCGACAGAACGACTACTGTCTCATCTCCATATGAG<br/> GAACATGACAGAAGAGAATGAAGAAGAAAGAGAATGTAGCCCCATTCCAGTGTGCTCTCTG<br/> TTCAGAGCGGAAAAGTCCACTTCCAAGGAATAGTTCTCAATCACATATCGGTATGTACAG</p> |

**Supplementary** Figure 1. Flowchart of all the *Y. lipolytica* strains constructed in this study.

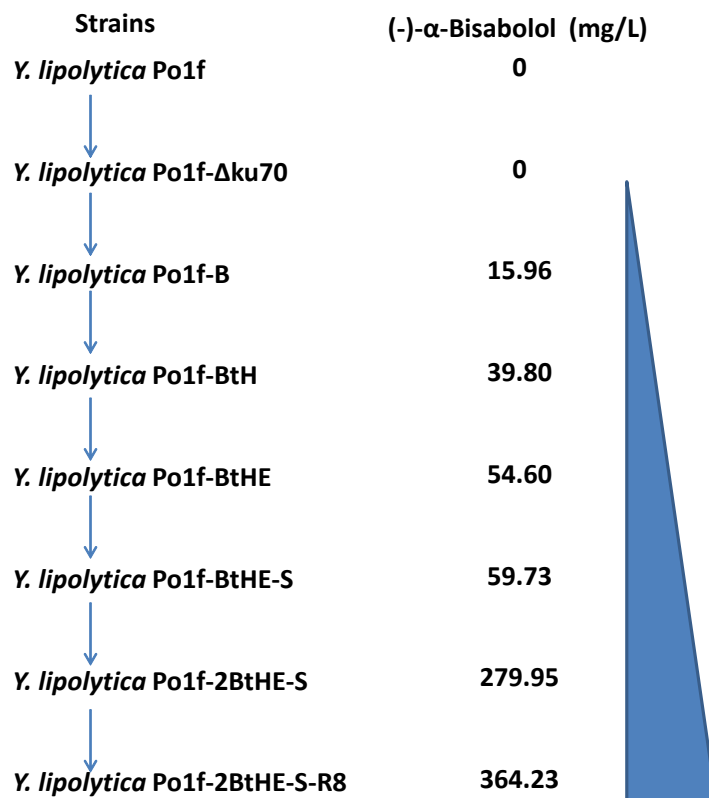

Supplement: d0gc03180a1.pdf [file d0gc03180a1.pdf]
